# Supplementary material for: A deeper insight into the deepest vertebrate of the sea
Source: Research Square preprint supplement (doi:10.21203/rs.3.rs-1828415/v1), 2022-08-01
Supplement: Supplementary file 3 [file 270e510ca1916170ff3a8adc.xlsx]

## Sheet: Supplementary Data 3
Supplementary Data 3 Expression of 33 de novo originated new genes in hadal snailfish in various tissues.
	Bone	Brain	Cholecyst	Eye	Heart	Liver	Muscle	Skin	Spinal cord	Stomach
HS11440	17.94	22.45	0.98	8.48	2.68	0.77	19.02	206.48	17.3	14.65
HS10530	78.1	191.62	35.06	96.96	77.79	26.28	60.21	58.12	133.98	29.22
HS20911	9.89	190.65	1.02	32.8	8.16	0.68	9.41	16.77	135.59	2.11
HS20875	79.26	139.46	36.99	161.62	19.62	25.78	53.55	30.21	34.13	14.06
HS05737	58.22	148.37	37.15	93.16	70.74	43.37	65.65	158.33	97.34	52.16
HS21957	42.61	150.11	12.42	32.04	45.23	12.51	31.58	77.04	96.54	14.74
HS22024	43.03	135.83	16.38	43.97	49.08	19.09	36.64	41.7	99.45	29.95
HS18778	43.1	61.49	43.49	66.53	59.08	89.38	50.07	105.72	49.43	123.23
HS05707	54.21	80.69	2.63	76.23	62.87	6.73	38.26	93.53	98	32.95
HS09008	1.23	89.7	1.16	1.81	4.07	0.43	1.22	0.19	59.89	2.01
HS10549	16.96	48.5	2.22	26.52	11.7	3.21	21.8	52.6	59.62	7.57
HS20898	25.88	50.98	12.5	48.02	18.25	17.39	20.97	27.29	41.02	14.51
HS20961	19.04	42.61	1.9	8.75	7.55	1.51	22.36	14.26	37.94	2.65
HS03682	12.37	22.17	10.53	41.49	8.6	19.06	7.1	10.08	13.97	11.49
HS10551	22.22	26.98	5.2	17.59	12.2	4.52	20.55	38.54	23.57	7.09
HS07787	12.54	21.26	6.46	34.47	10.75	8.81	9.59	7.85	18.75	7.82
HS18114	29.34	25.48	0.63	7.05	19.37	0.28	27.61	7.88	18.4	1.67
HS09009	0.58	28.76	0.48	0.17	0.89	0.13	0.54	0.02	17.46	0.32
HS16209	8.6	25.95	14.98	13.58	18.45	11.05	7.83	10.74	27.51	7.28
HS13518	6.05	25.63	4.72	12.65	14.58	12.12	10.95	24.03	16.68	10.02
HS11376	8.67	17.49	8.8	20.51	5.86	10.08	8.35	15.59	6.1	9.09
HS00015	7.75	18.09	14.35	15.65	6.2	7.74	5.29	5.82	10.56	3.91
HS09581	3.07	4.59	2.75	12.81	3.44	2.06	2.46	2.98	4.05	2.17
HS18838	2.71	12.54	0.69	2.92	3.6	0.61	1.52	7.34	10.09	1.94
HS03539	1.15	2.54	0.52	11.18	3.2	1.26	2.08	2.43	3.09	3
HS12807	6.89	10.55	1.34	9	4.68	2	2.85	4.92	5.76	1.52
HS12695	0.67	7.51	2.56	3.83	3.47	1.91	2.88	1.45	2.88	1.65
HS18159	7.23	6.87	0.63	1.63	0.44	1.7	1.21	0.58	6.02	1.32
HS20896	2.83	5.79	0.45	5.44	2.33	1.37	1.23	3.32	2.56	1.99
HS19803	1.82	5.28	0.01	4.27	1.64	0.19	1.03	0.54	3.62	5.3
HS15699	0	4.87	0.51	0.64	0.47	0.3	0.28	0.05	2.64	0.58
HS22086	1.33	1.65	1.22	3.71	1.4	1.11	2.54	1.11	2.61	2.91
HS11496	0.12	1.73	1.92	0.14	0.58	0.45	1.5	0.12	1.03	0.21
