# Supplementary material for: A deeper insight into the deepest vertebrate of the sea
Source: Research Square preprint supplement (doi:10.21203/rs.3.rs-1828415/v1), 2022-08-01
Supplement: Supplementary file 5 [file be5ad48d9248ee7b1a0dc2f4.xlsx]

## Sheet: Supplementary Data 5
Supplementary Data 5 The genes were significantly overexpressed in all organs in hadal snailfish, and the blue ones were associated with DNA repair. HS denotes hadal snailfish; Tanaka denotes Tanaka’s snailfish.
Gene	Gene name	Bone			Brain			Cholecyst		Eye			Heart			Liver			Muscle			Skin			Spinal			Stomach
		HS	Tanaka	zebrafish	HS	Tanaka	zebrafish	HS	Tanaka	HS	Tanaka	zebrafish	HS	Tanaka	zebrafish	HS	Tanaka	zebrafish	HS	Tanaka	zebrafish	HS	Tanaka	zebrafish	HS	Tanaka	zebrafish	HS	Tanaka
HS17379	foxg1c	50.34	0.14	1.11	65.39	0.91	0.29	34.35	0.63	87.88	0.57	0.24	48.71	0.07	0.94	34.13	0.03	0.2	48.93	0.08	0.22	81.51	0.97	1.16	78.76	0.16	0.73	52.18	0.05
HS10321	si:dkeyp-110a12.4	99.49	0.37	3.03	244	2.36	8.77	91.57	2.4	119.23	2.27	0.26	92.52	1.82	0.08	21.8	0.13	0	236.98	0.57	0.14	60.95	1.52	0	207.3	1.24	16.91	18.07	0.7
HS03976	espnla	31.36	0.91	0.42	140.19	1.25	2.51	10.4	0.08	66.01	1.95	0.69	33.21	0.7	0.02	8.77	0.09	0	38.71	0.58	0.08	26.7	1.15	0.16	93.37	0.7	0.64	12.08	0.26
HS12263	si:ch1073-416j23.1	68.22	1.18	0.12	68.16	5.25	0.53	27.6	0.12	44.52	2.06	0.3	32.22	1.72	0.24	16.78	0.31	0	25.23	0.16	0.12	16.2	0.75	0.05	61.7	4.2	0.44	12.94	0.24
HS02302	HUS1B	26.58	3.14	6.42	39.89	3.08	4.54	19.64	5.56	30.07	3.18	4.31	23.33	2.97	3.46	15.04	2.1	0.88	21.68	0.88	2.3	20.4	1.34	3.02	35.54	4.34	5.81	13.49	1.35
HS05309	LRRC56	16.14	0.55	0.59	22.32	0.7	0.86	6.32	0.58	7.65	0.34	0.13	12.66	0.11	0.04	5.33	0.06	0	12.8	0.11	0.06	14.78	0.26	0.32	13.4	1.17	2.09	8.08	0.42
HS19896	si:ch211-256e16.6	40.64	1.03	0	115.38	2.89	0.02	24.29	3.12	57.17	3.99	0.05	42.12	1.98	0.15	19.03	0.51	0	45.48	0.81	0.01	48.31	1.47	0	72.01	3.23	0	11.84	1
HS08939	mcm9	12.73	0.89	2.39	56.61	1.91	1.52	18.15	2.37	21.6	2.29	0.42	15.16	1.42	1.37	16.4	1.14	0.09	13.16	0.44	0.2	32.27	0.93	1.38	35.31	0.98	0.81	16.55	1.01
HS07335	cdc7	40.63	2.83	3.13	45.37	1.13	0.14	48.61	4.92	30.71	2.52	0.27	47.98	3.36	1.02	41.84	2.69	0.04	30.11	0.67	0.05	36.72	1.77	1.46	33.84	2.06	0.39	18.91	1.49
HS08746	raf1a	74.46	8.45	10.15	59.11	4.96	3.64	119.34	9.62	58.38	6	2.93	45.92	8.52	7.73	92.45	10.59	2.91	93.46	5.18	3.63	60.22	7.64	9.22	44.94	7.52	9.07	68.75	5.3
HS13385	trim23	130.83	3.59	8.4	401.37	22.25	38.22	89.87	5.02	105.29	9.55	13.67	102.8	3.42	5.25	52.64	1.49	1.15	91.13	1.05	3.18	52.19	2	4.87	196.17	13.96	23.86	40.37	2.78
HS17119	exosc3	525.87	34.5	16.22	595.8	38.42	9.78	392.87	74.98	410.27	33.08	7.51	356.68	39.57	11.03	264.27	18.7	6.73	359.69	14.91	7.08	423.36	26.4	15.02	455.3	34.84	6.04	252.14	32.88
HS20492	si:dkey-260c8.8	18.06	1.26	1.31	35.13	2.09	0.78	11.71	2.02	23.37	1.51	0.34	15.14	1.64	0.97	9.18	0.84	0.1	15.56	0.4	0.1	20.14	1.25	0.96	26.95	1.99	1.43	14.16	1.2
HS14256	tcaim	116.94	3.01	5.41	183.35	6.81	0	48.48	3.42	101	8.61	0.14	90.04	9.03	13.86	40.04	3.45	2.28	95.23	1.47	0	58.32	3.28	6.53	138.12	6.54	21.35	29.35	4.18
HS08025	zgpat	51.71	5.72	12.94	113.04	14.9	11.57	41.49	7.48	67.84	13.71	5.4	50.43	6.49	9.18	40.57	2.97	1.92	51.26	2.3	1.87	55.2	4.12	11.26	75.68	10.55	15.99	38.1	4.95
HS21419	pex6	43.94	4.51	3.08	86.13	9.06	3.2	32.68	7.84	25.46	7.67	3.01	41.37	3.56	1.74	17.76	3.51	0.9	28.57	1.09	0.39	24.46	2.86	2.53	51.22	6.71	6.82	14.41	3.5
HS15267	zpr1	221.81	9.98	13.13	413.16	23.34	34.68	68.77	14.7	183.72	18.83	19.23	136.81	9.58	7.36	55.23	6.04	3.6	111.44	5.07	9.23	126.83	7.71	16.12	301.13	16.84	42.04	92.66	11.94
HS15147	pcif1	48.05	3.96	5.5	66.82	11.7	9.29	29.51	3.93	66.99	20.22	3.9	47.04	4.16	4.34	27.26	2.18	1.24	33.38	1.84	0.95	35.8	3.39	7.29	38.49	6.82	11.71	23.61	3.07
HS20241	tecpr1b	32.38	1.69	2.13	83.46	12.49	15.9	30.19	1.79	148.02	48.68	13.72	23.69	1.6	0.6	25.98	0.81	0	29.63	1.37	1.76	31.24	3.04	0.45	54.92	4.26	1.76	19.15	1.86
HS20795	ccdc97	100	5.25	10.63	156.76	11.33	21.94	41.57	11.43	87.19	12.08	11.21	76.53	11.01	7.14	35.31	4.47	2.65	61.79	2.55	5.17	93.73	4.61	9.73	113.38	10.33	15.91	39.11	5.2
HS07235	TADA1	47.51	4.33	8	71.7	9.75	34.69	20.29	6.45	57.82	9.01	16.53	40.62	5.44	7.64	19.24	1.99	2.01	33.81	1.6	5.04	37.17	3.66	8.19	54.88	4.94	24.17	22.63	4.39
HS02660	myef2	275.31	20.17	57.4	672.58	60.92	0.01	115.93	49.32	418.99	104.6	0.02	264.95	29.68	22.86	67.26	12.26	8.37	179.91	9.65	0.01	182.61	18.45	40.64	481.56	42.19	55.7	75.21	23.6
HS12565	ccnyl1	134.48	15.63	12.53	270.75	45.76	44.38	64.41	17.66	263.95	51.06	62.83	109.87	14.99	13.71	45.49	6.2	3.81	130.31	8.64	8.17	146.78	13.39	15.14	207.89	25.81	56.3	55.19	9.23
HS18272	mus81	29.03	2.32	7.55	84.7	5.2	1.76	10.41	4.14	27.87	3.92	0.88	21.68	5.21	0.98	8.77	1.94	0.31	18.78	1.06	0.64	29.44	1.75	3.24	49.82	4.62	1.98	18.21	3.42
HS05015	saal1	117.21	11.67	6.27	284.36	18.18	6.54	53.38	17.35	148.99	17.68	4.39	101.41	15.36	4.57	54.27	7.27	0.68	116.37	5.63	1.27	135.22	9.9	3.87	193.77	13.57	6.04	57.48	6.73
HS06374	rnf215	92.24	7.97	4.5	59.94	12.15	4.1	30.46	3.93	52.15	24.01	4.89	64.67	4.88	2.76	28.51	2.66	1.49	52.32	1.5	1.06	38.64	3.93	3.84	57	11.33	3.97	25.94	4.09
HS19841	nfatc2ip	232.93	14.72	18.32	624.44	23.52	26.18	95.19	36.2	153.4	23.8	16.93	185.51	24.07	10.68	56.63	6.68	4.3	133.92	5.05	7.28	154.2	11.07	23.58	420.63	21.4	22.73	64.65	16.75
HS06811	rad17	48.77	4.04	6.56	50.03	9.65	2.64	17.65	5.29	38.05	10.58	3.99	27.42	4.21	4.54	18.53	1.57	1.02	29.11	1.94	0.6	34.73	2.95	6.17	26.03	6.95	6.54	18.87	2.39
HS00765	tatdn1	193.59	14.17	13.22	430.04	16.01	24.8	81.99	24.13	115.39	8.89	13.53	171.04	16.15	4.32	66.77	10.13	5.41	149.43	9.24	6.43	135.93	10.87	21.28	377.22	13.64	34.06	97.05	10.44
HS05349	washc4	88.14	5.98	8.16	111.31	18.4	16.06	38.53	8.64	61.4	16.19	9.32	74.6	13.93	4.54	26.68	4.33	2.23	50.32	1.6	4.06	34.01	4.77	11.66	84.92	13.19	15.28	26.45	6.55
HS19771	washc5	103.32	8.19	12.37	146.36	18.37	36.02	30.36	13.52	111.34	16.62	14.37	80.56	22.4	7.26	28.61	3.91	2.27	60.69	1.82	3.36	60.67	6.52	15.81	97.09	17.37	27.46	42.74	7.41
HS12043	ccz1	127.61	12.7	20.3	332.8	25.63	26.63	83.68	40.61	146.3	20.04	21.25	123.08	13.53	15.33	65.99	7.32	4.31	117	6.55	6	125.39	8.45	22.71	259.65	26.77	41.47	126.64	15.53
HS13779	si:ch73-173p19.1	71.3	6.24	7.35	75.83	15.44	17.87	34.42	12.46	70.29	26.6	14.26	40.68	7.67	6.22	37.24	3.35	3.25	40.34	2.07	2.34	33.6	5.06	9.06	40.76	13.41	15.92	34.23	7.05
HS13655	lrrc31	36.45	1.59	2.83	24.21	2.02	0.78	27.71	3.35	19	0.96	0.58	26.67	8.33	0.93	21.44	0.15	2.24	16.26	0.11	0.28	17.01	0.45	2.14	27.63	2.9	1.15	22.15	6.62
