# Supplementary material for: A deeper insight into the deepest vertebrate of the sea
Source: Research Square preprint supplement (doi:10.21203/rs.3.rs-1828415/v1), 2022-08-01
Supplement: Supplementary file 6 [file fa15a7763b6c17bb4e8d88d7.docx]

**Supplemental Information for**

**A deeper insight into the deepest vertebrate of the sea**

Wenjie Xu1,†, Chenglong Zhu1,†, Baosheng Wu1,†, Mingliang Hu1,†, Han Xu2,†, Chenguang Feng1, Xiaoni Gan3, Jiangmin Zheng1, Jing Bo2, Lisheng He2, Qiang Qiu1, Wen Wang1, Shunping He1,2,3*, Kun Wang1,2,*

†These authors contributed equally to this work.

*Corresponding author. Email: [wk8910@gmail.com](mailto:wk8910@gmail.com) (K.W.); [clad@idsse.ac.cn](mailto:clad@idsse.ac.cn) (S.H.)

**This file includes:**

Supplementary Figs. 1-19

Supplementary Tables 1-15

## Supplementary Figures


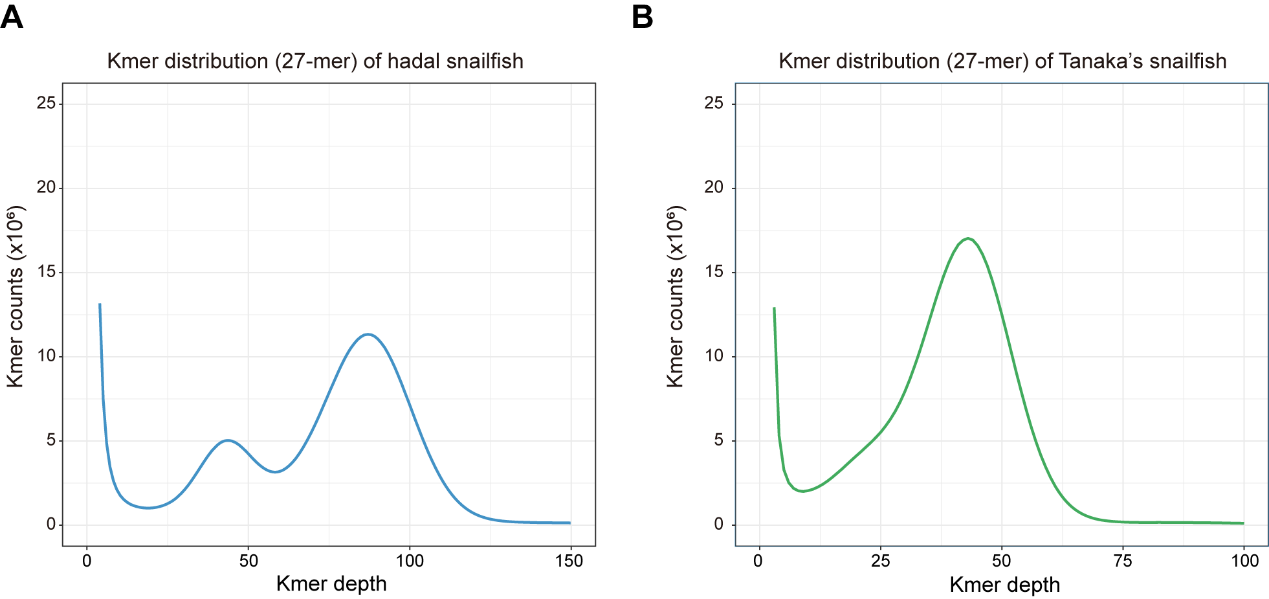


### Supplementary Fig. 1. *K*-mer (k=27) distribution of the hadal snailfish (A) and Tanaka’s snailfish (B). Genome size was estimated by: Genome Size = *knum*/*kdepth*. The estimated genome size 633.2 Mb for hadal snailfish and 539.9 Mb for Tanaka’s snailfish respectively.


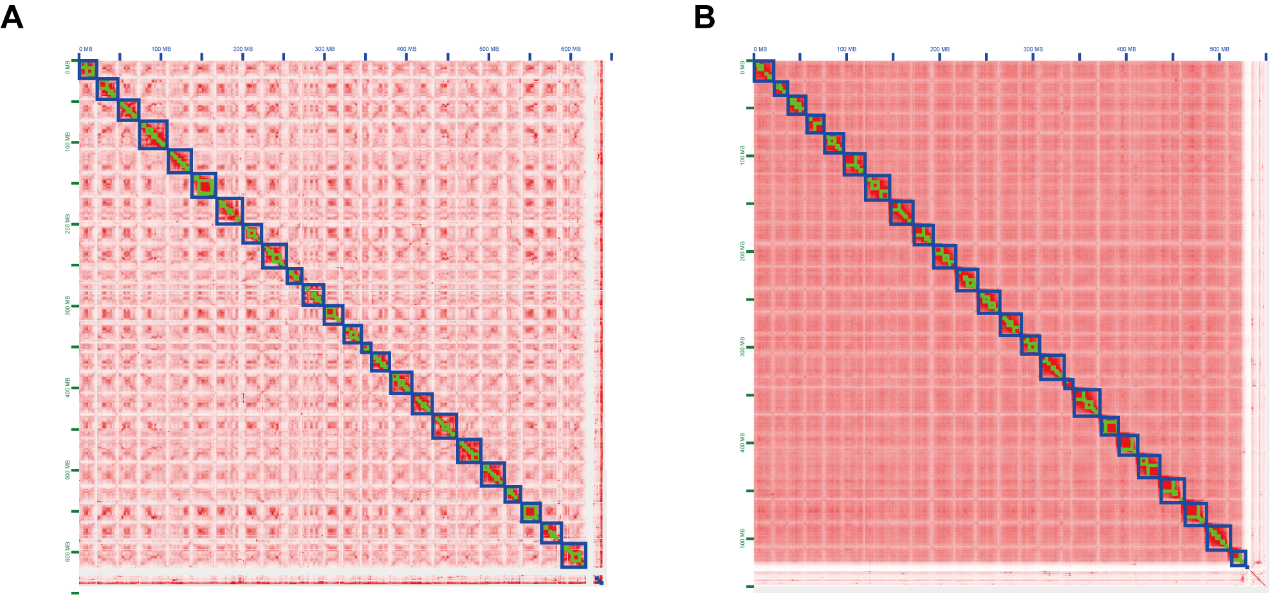


### Supplementary Fig. 2. Genome assembly of hadal snailfish (C) and Tanaka’s snailfish (D), both of them assembled 24 chromosomes.

**
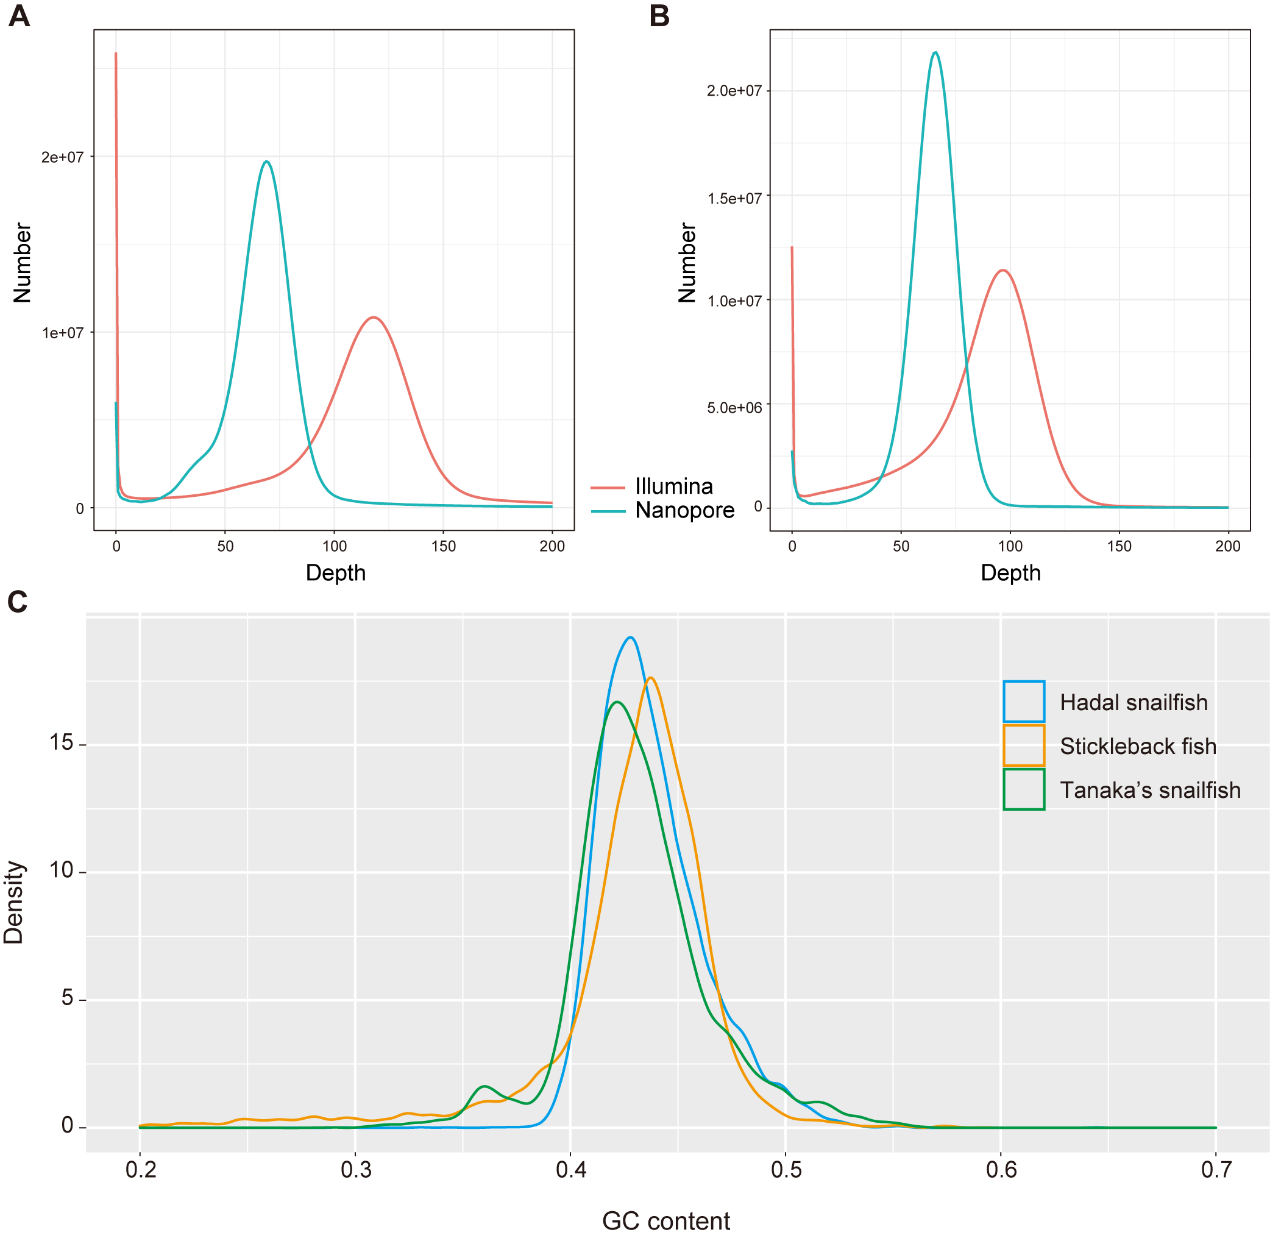
**

### Supplementary Fig. 3. Distribution of read depths in the genomes of hadal snailfish (A) and Tanaka's snailfish (B). (C) The density of the GC content of the hadal snailfish, Tanaka’s snailfish and stickleback.

**
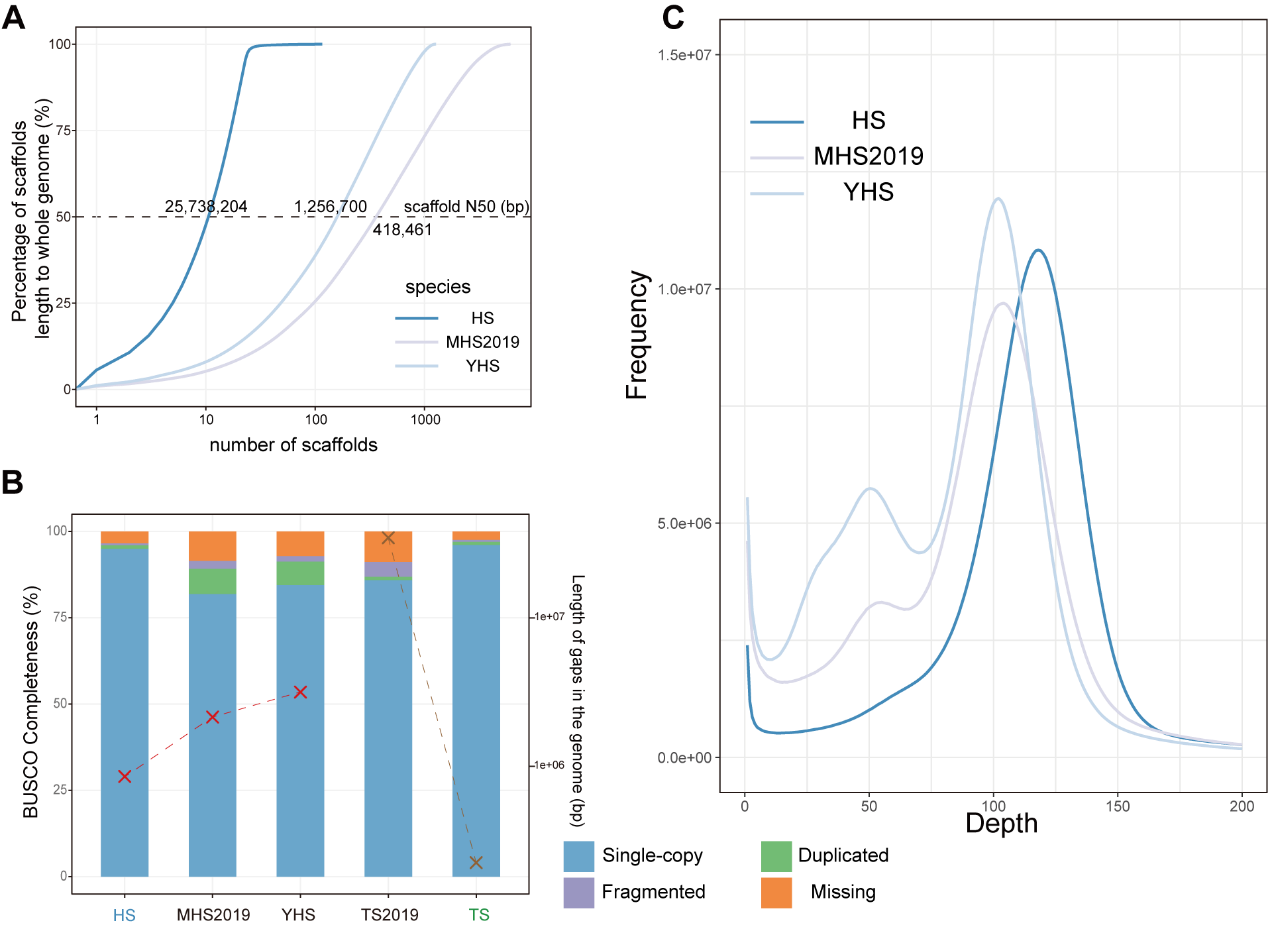
**

### Supplementary Fig. 4. Improved genome assembly for hadal snailfish. (A) Comparison of assembly contiguity in hadal snailfish. The x-axis is the number of scaffolds, and the y-axis is the length of the scaffold as a percentage of the total genome length. HS: the hadal snailfish genome assembled in this work, MHS2019: https://figshare.com/articles/dataset/Genome_assembly_of_Mariana_hadal_snailfish/9782414?file=17520179, YHS: GCA_004335475.1. (B) Length of the gaps and BUSCO genome assessment in each genome assembly. (C) Assessment of heterozygous sequences in different versions of hadal snailfish genome. These sequences were largely resulted from assembly redundancy. The horizontal coordinate refers to the read depth, and the vertical coordinate refers to the read occurrence frequency.


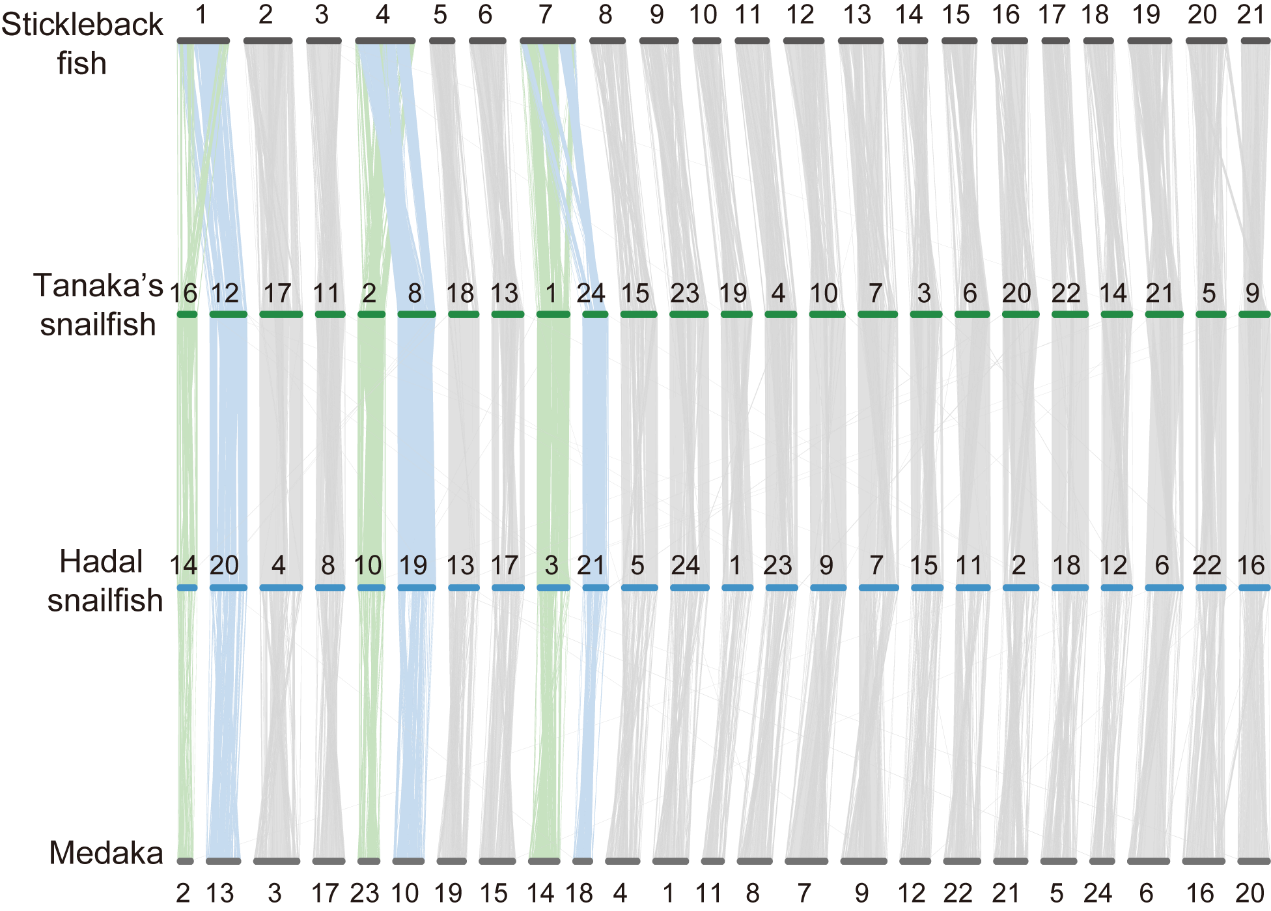


### Supplementary Fig. 5. Chromosomal syntenic relationship of hadal snailfish, Tanaka's snailfish, medaka, and stickleback. Each line represents a syntenic block of 10 or more zones from the results of LAST with a similarity of 75% or more and length > 1,000 bp.


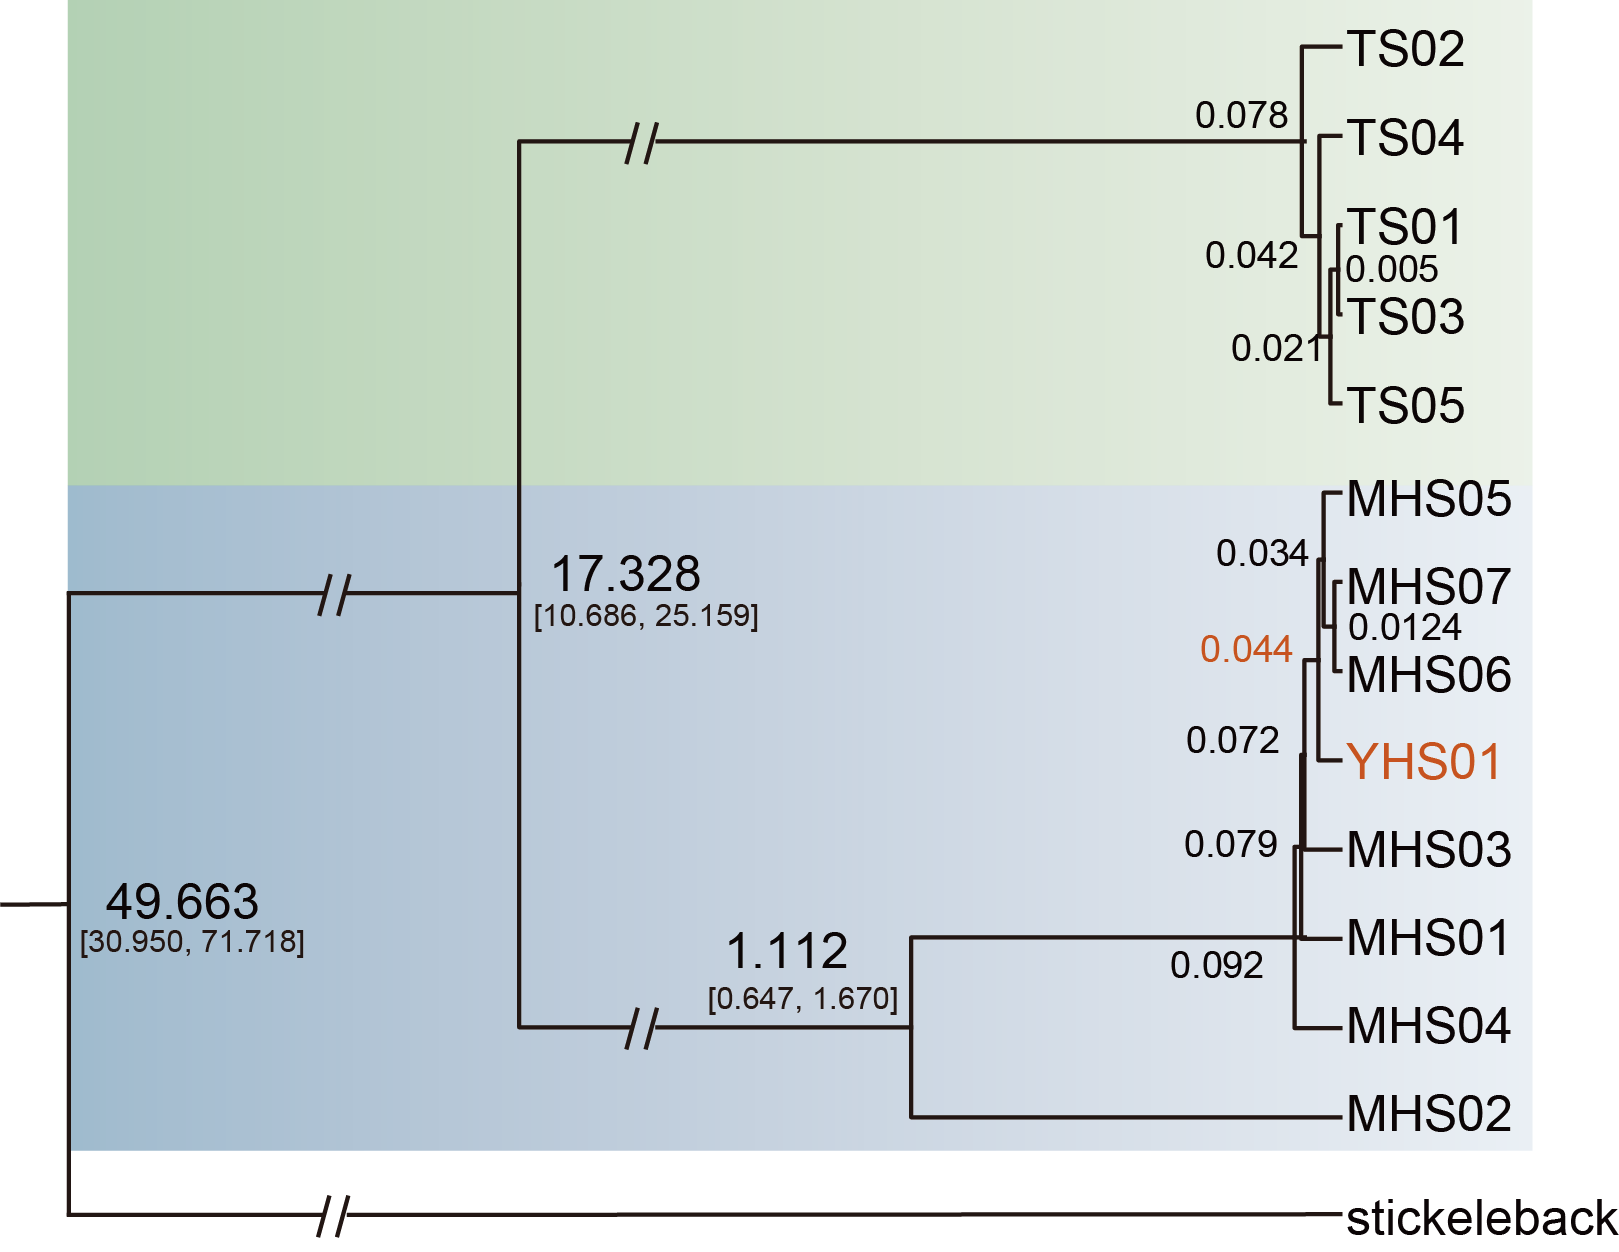


### Supplementary Fig. 6. The divergence time between Yap hadal snailfish (YHS) and Mariana hadal snailfish. Phylogenetic tree constructed using the coding sequences of 13 mitochondrial genes (*atp6, atp8, co1, co2, co3, cytb, nd1, nd2, nd3, nd4, nd4l, nd5, nd6*), in which the divergence time between YHS and MHS was 0.044 million years ago.

**
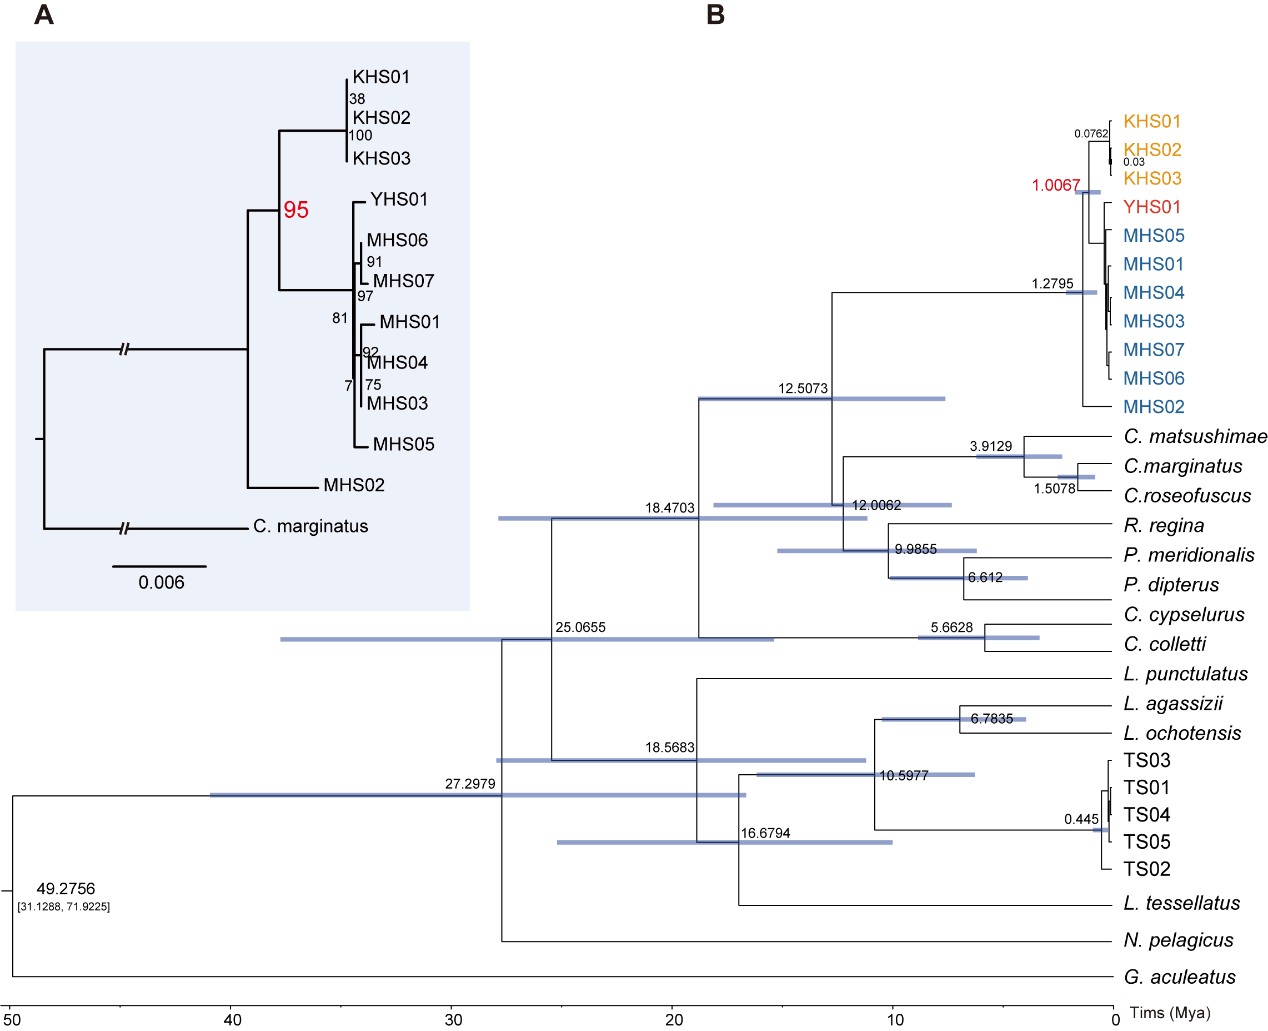
**

### Supplementary Fig. 7. Phylogenetic relationships of the family Liparidae. (A) Phylogenetic tree constructed using RAxML with the selected parameter “-N 100” based on the coding sequences of *co1* and *cytb*, where the support of KHS and MHS divergence nodes was 95. (B) Phylogenetic tree constructed with the coding sequences of 2 mitochondrial genes (*co1* and *cytb*), where the divergence between KHS and MHS was 1.0067 million years ago.

**
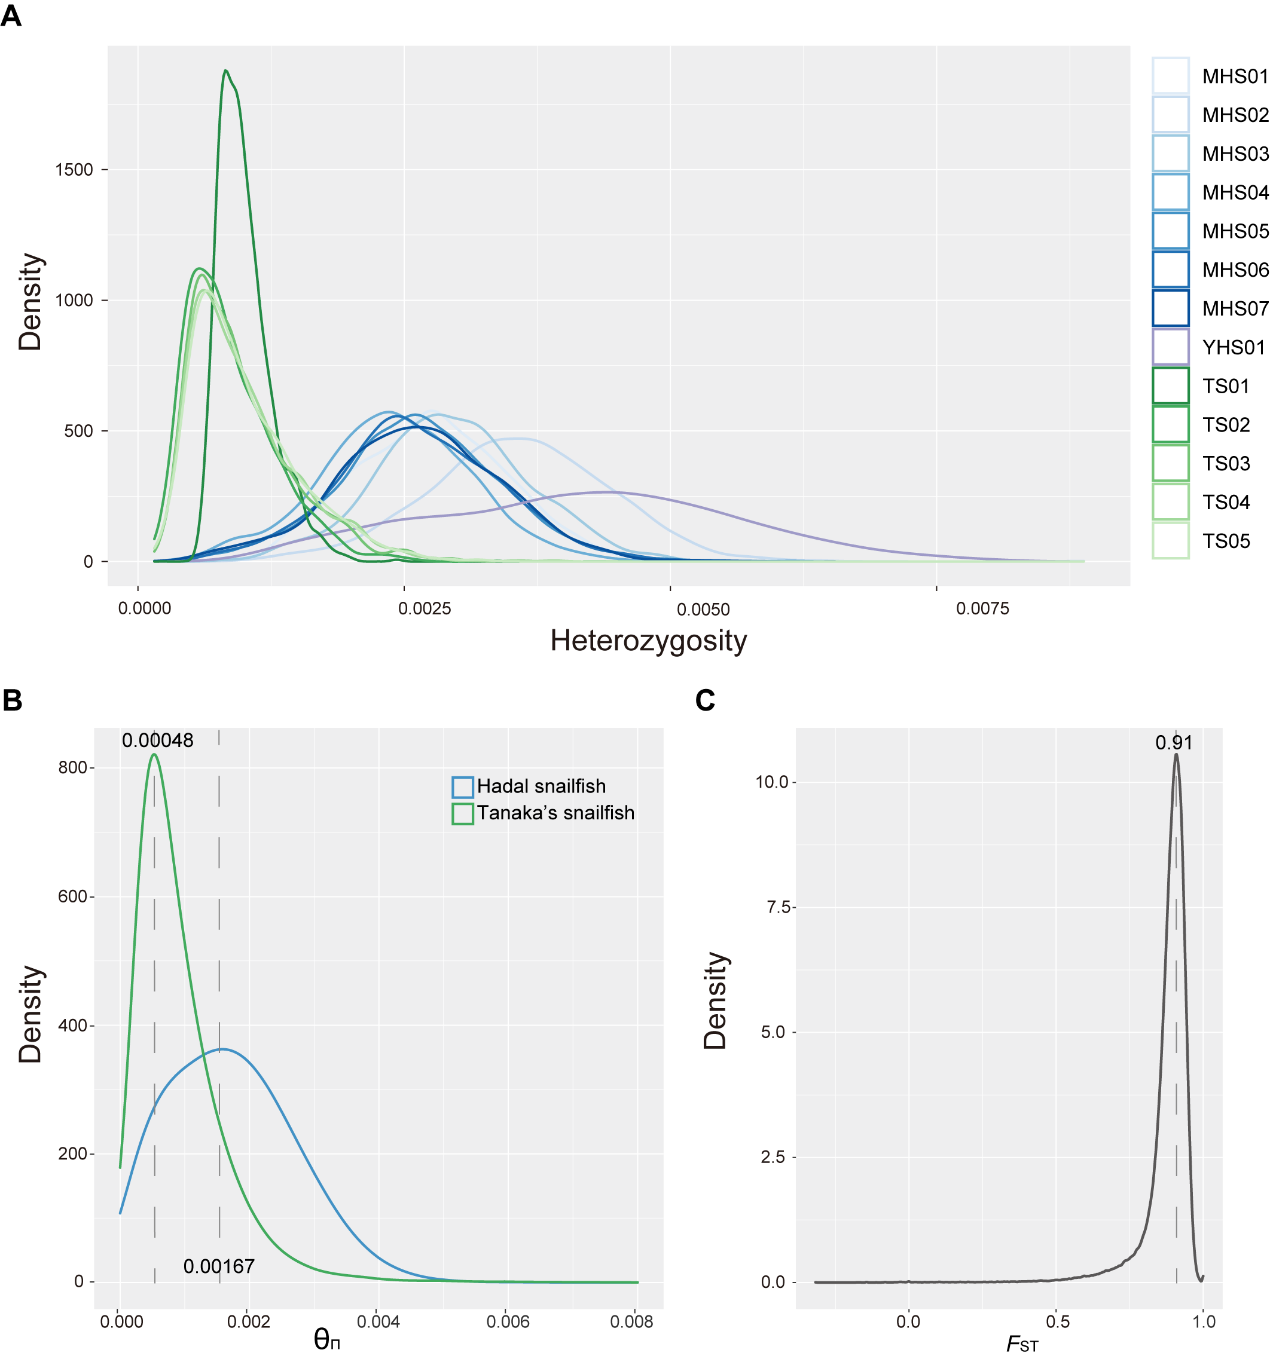
**

### Supplementary Fig. 8. Diversity statistics. (A) Heterozygosity ratio per 500KB in different individuals of hadal snailfish and Tanaka’s snailfish. Distribution of Π of 10 kb windows (B) and FST of 10 kb windows with 1 kb steps (C).

**
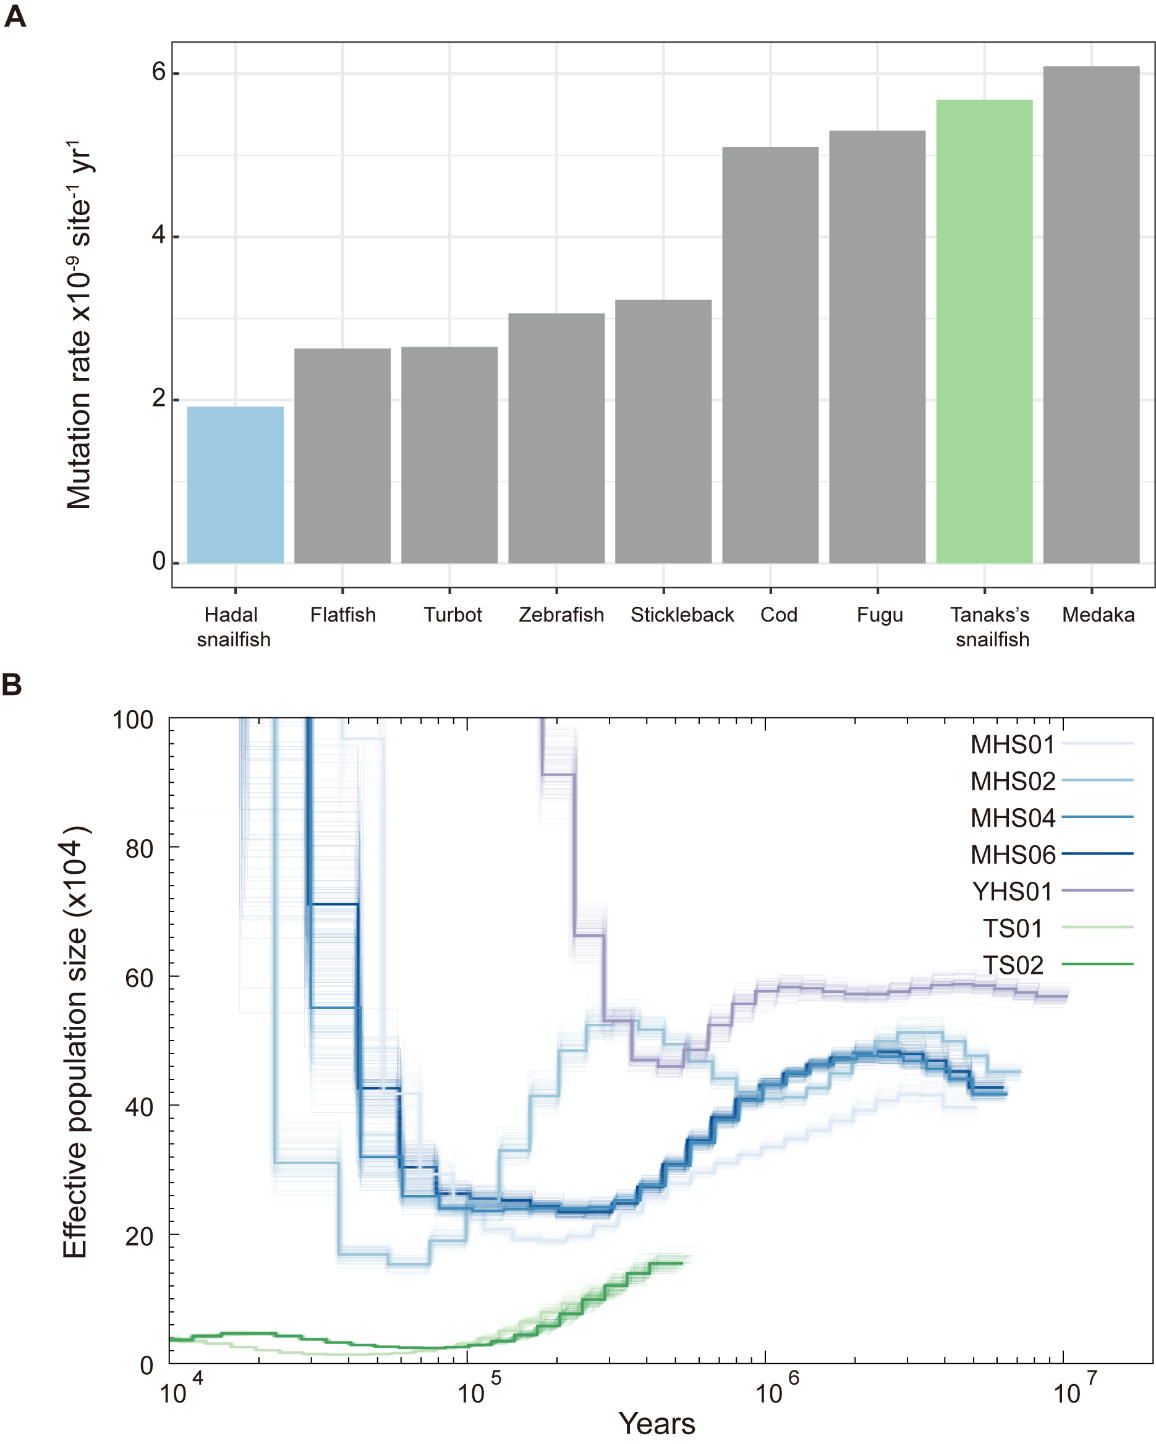
**

### Supplementary Fig. 9. Demographic analysis. The mutation ratio among 9 teleosts and the demographic history for hadal snailfish and Tanaka’s snailfish. (A) The mutation ratio is inferred by the fourfold degenerate synonymous site (4D). (B) Demographic history for 5 hadal snailfish individuals and 2 Tanaka’s snailfish individuals inferred by PSMC based on the Illumina data using “g=1 year”.

**
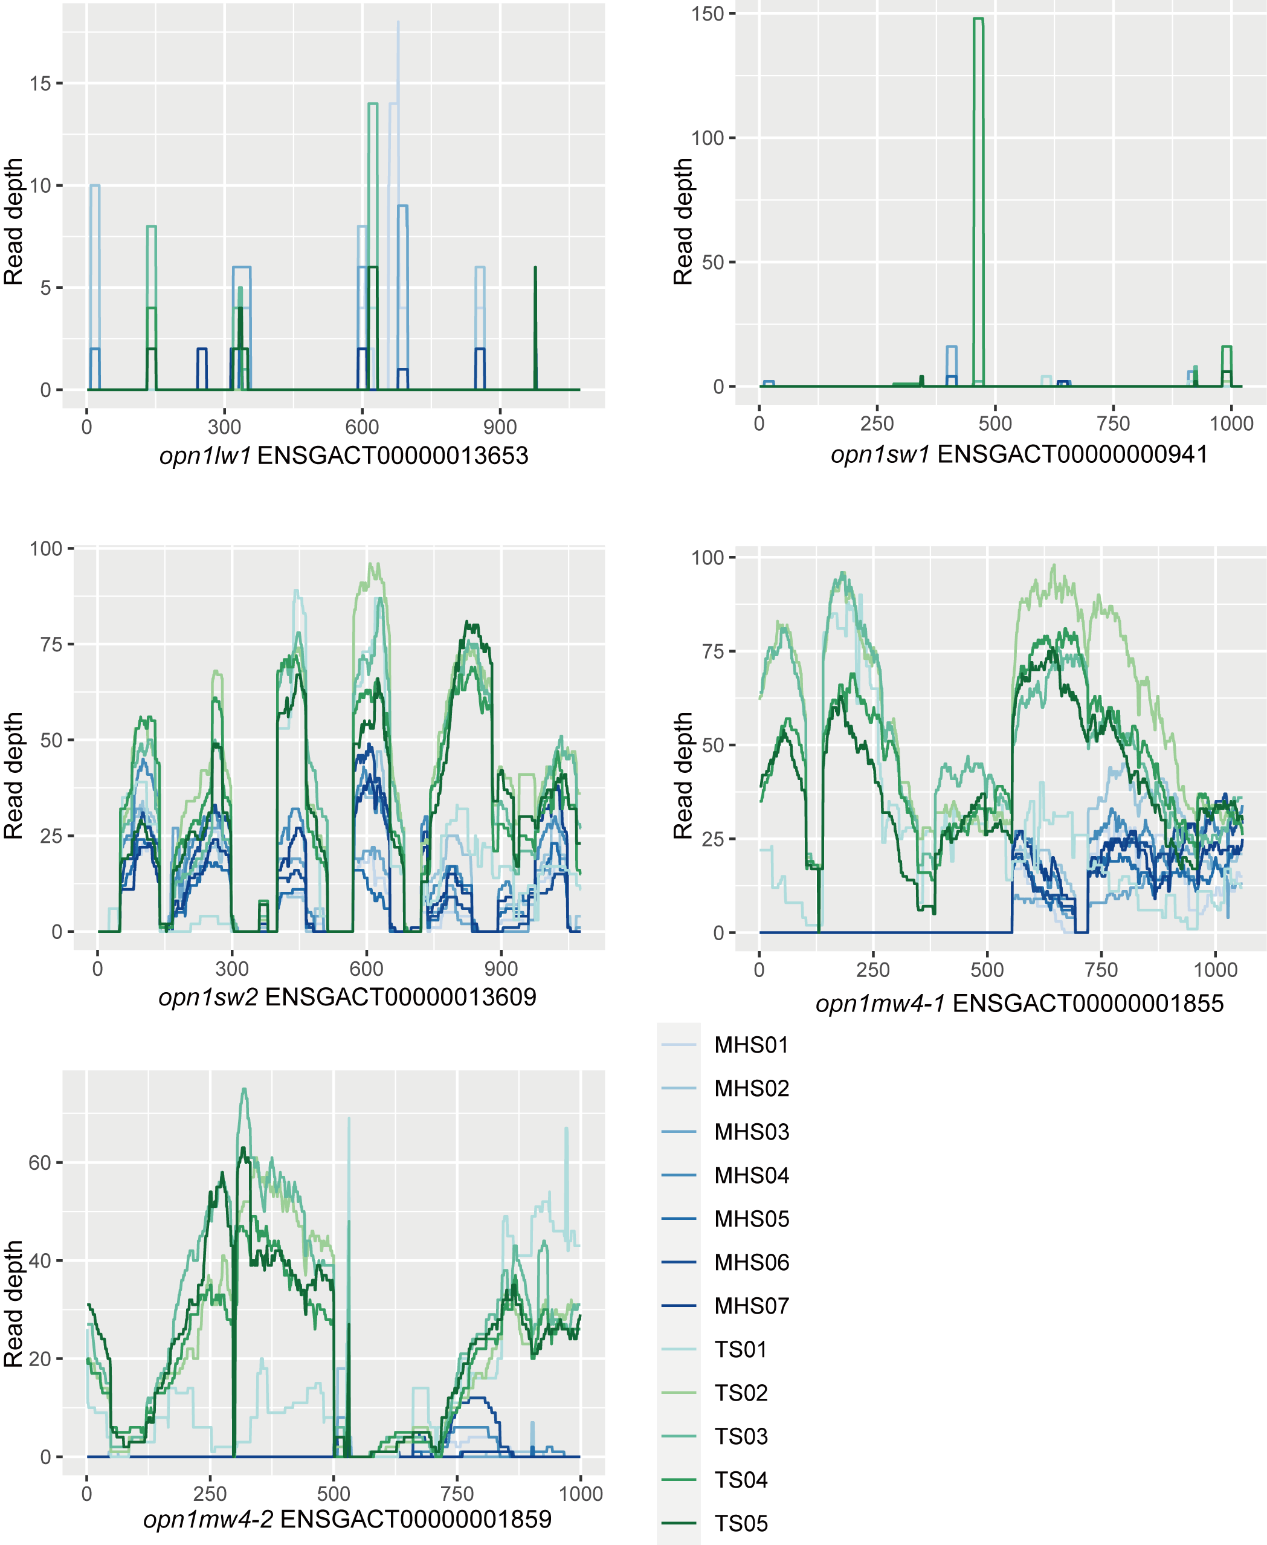
**

### Supplementary Fig. 10. Loss of vision-related genes in hadal snailfish. Short reads from 7 hadal snailfish individuals (MHS01-MHS07) and 5 Tanaka's snailfish individuals (TS01-TS05) were mapped with stickleback's genome sequence, in which *opn1lw1*, *opn1sw1* and *rh2* genes were lost in hadal snailfish.

**
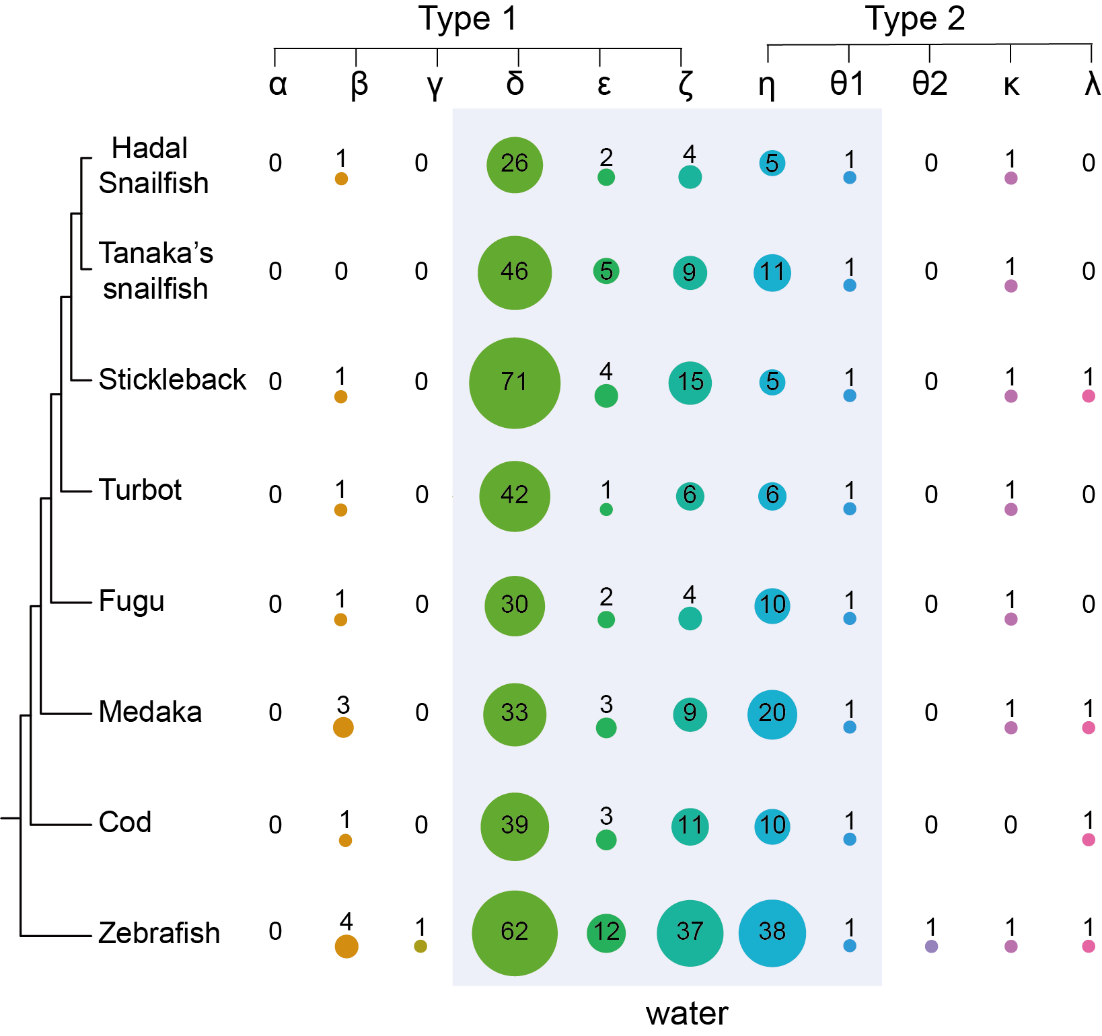
**

### Supplementary Fig. 11. The number of olfactory receptors in eight species. "Air" (yellow circles) and "water" (blue circles) refer to the detection of airborne and water-soluble odorants, respectively. The size of the circles indicates the number of intact OR genes.

**
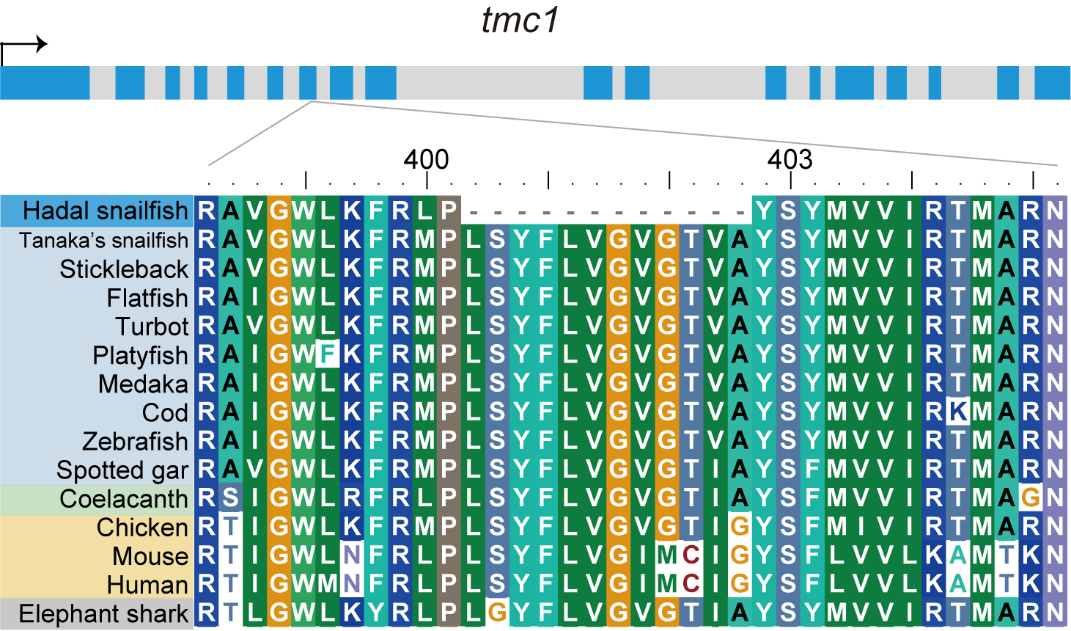
**

### Supplementary Fig. 12. Sequence alignment revealed that the amino acid sequence of *tmc1* was specifically deletion in hadal snailfish. The gray bar with blue stripes shows the exon-intron structure of *tmc1*.

**
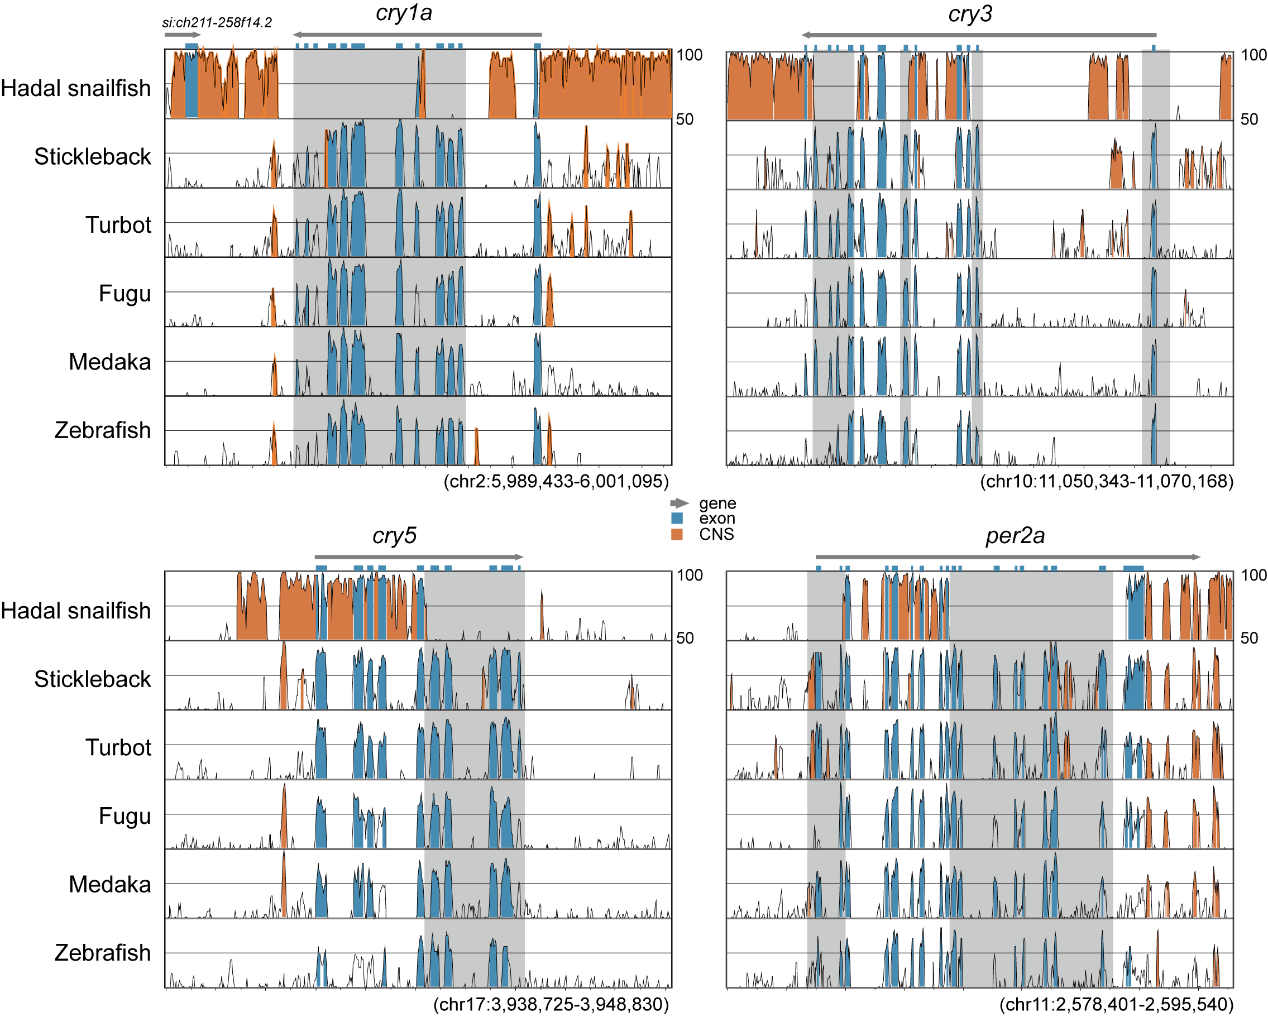
**

### Supplementary Fig. 13. Genetic changes involved in light-mediated regulation of the molecular clock in hadal snailfish suprachiasmatic nucleus (SCN) neurons, using Tanaka’s snailfish (this work) as references.

**
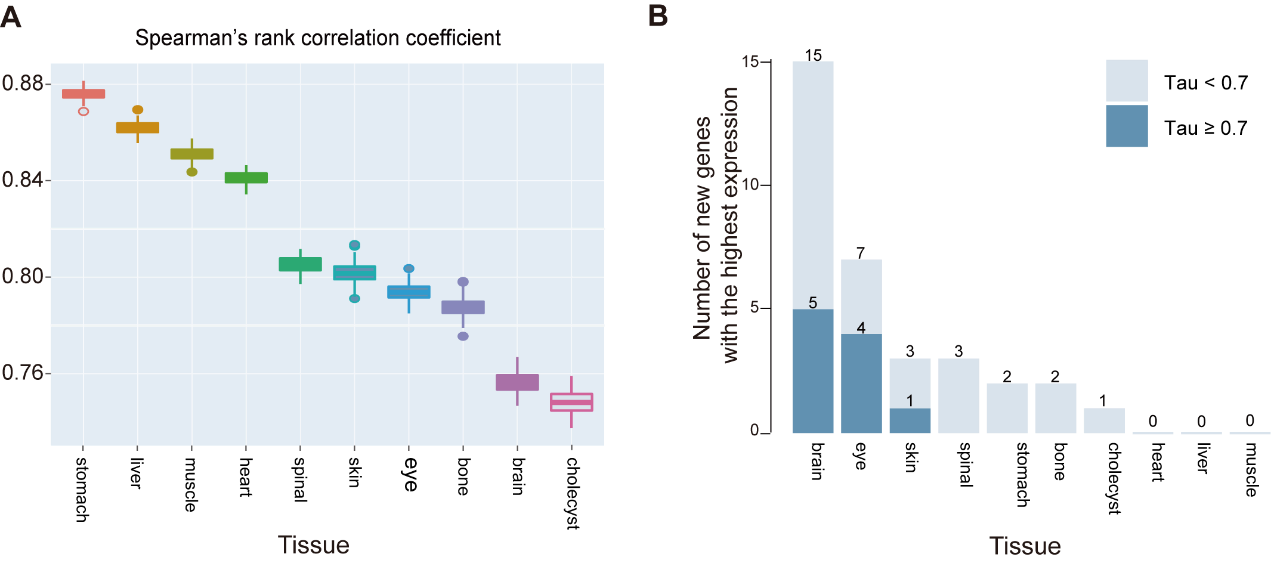
**

### Supplementary Fig. 14. (A) Differences in gene expression between species for each organ. Box plots of Spearman rank correlation coefficients for each organ of hadal snailfish and Tanaka's snailfish based on 1000 bootstrap replicates. (B) Expression of new genes in hadal snailfish in various tissues.

**
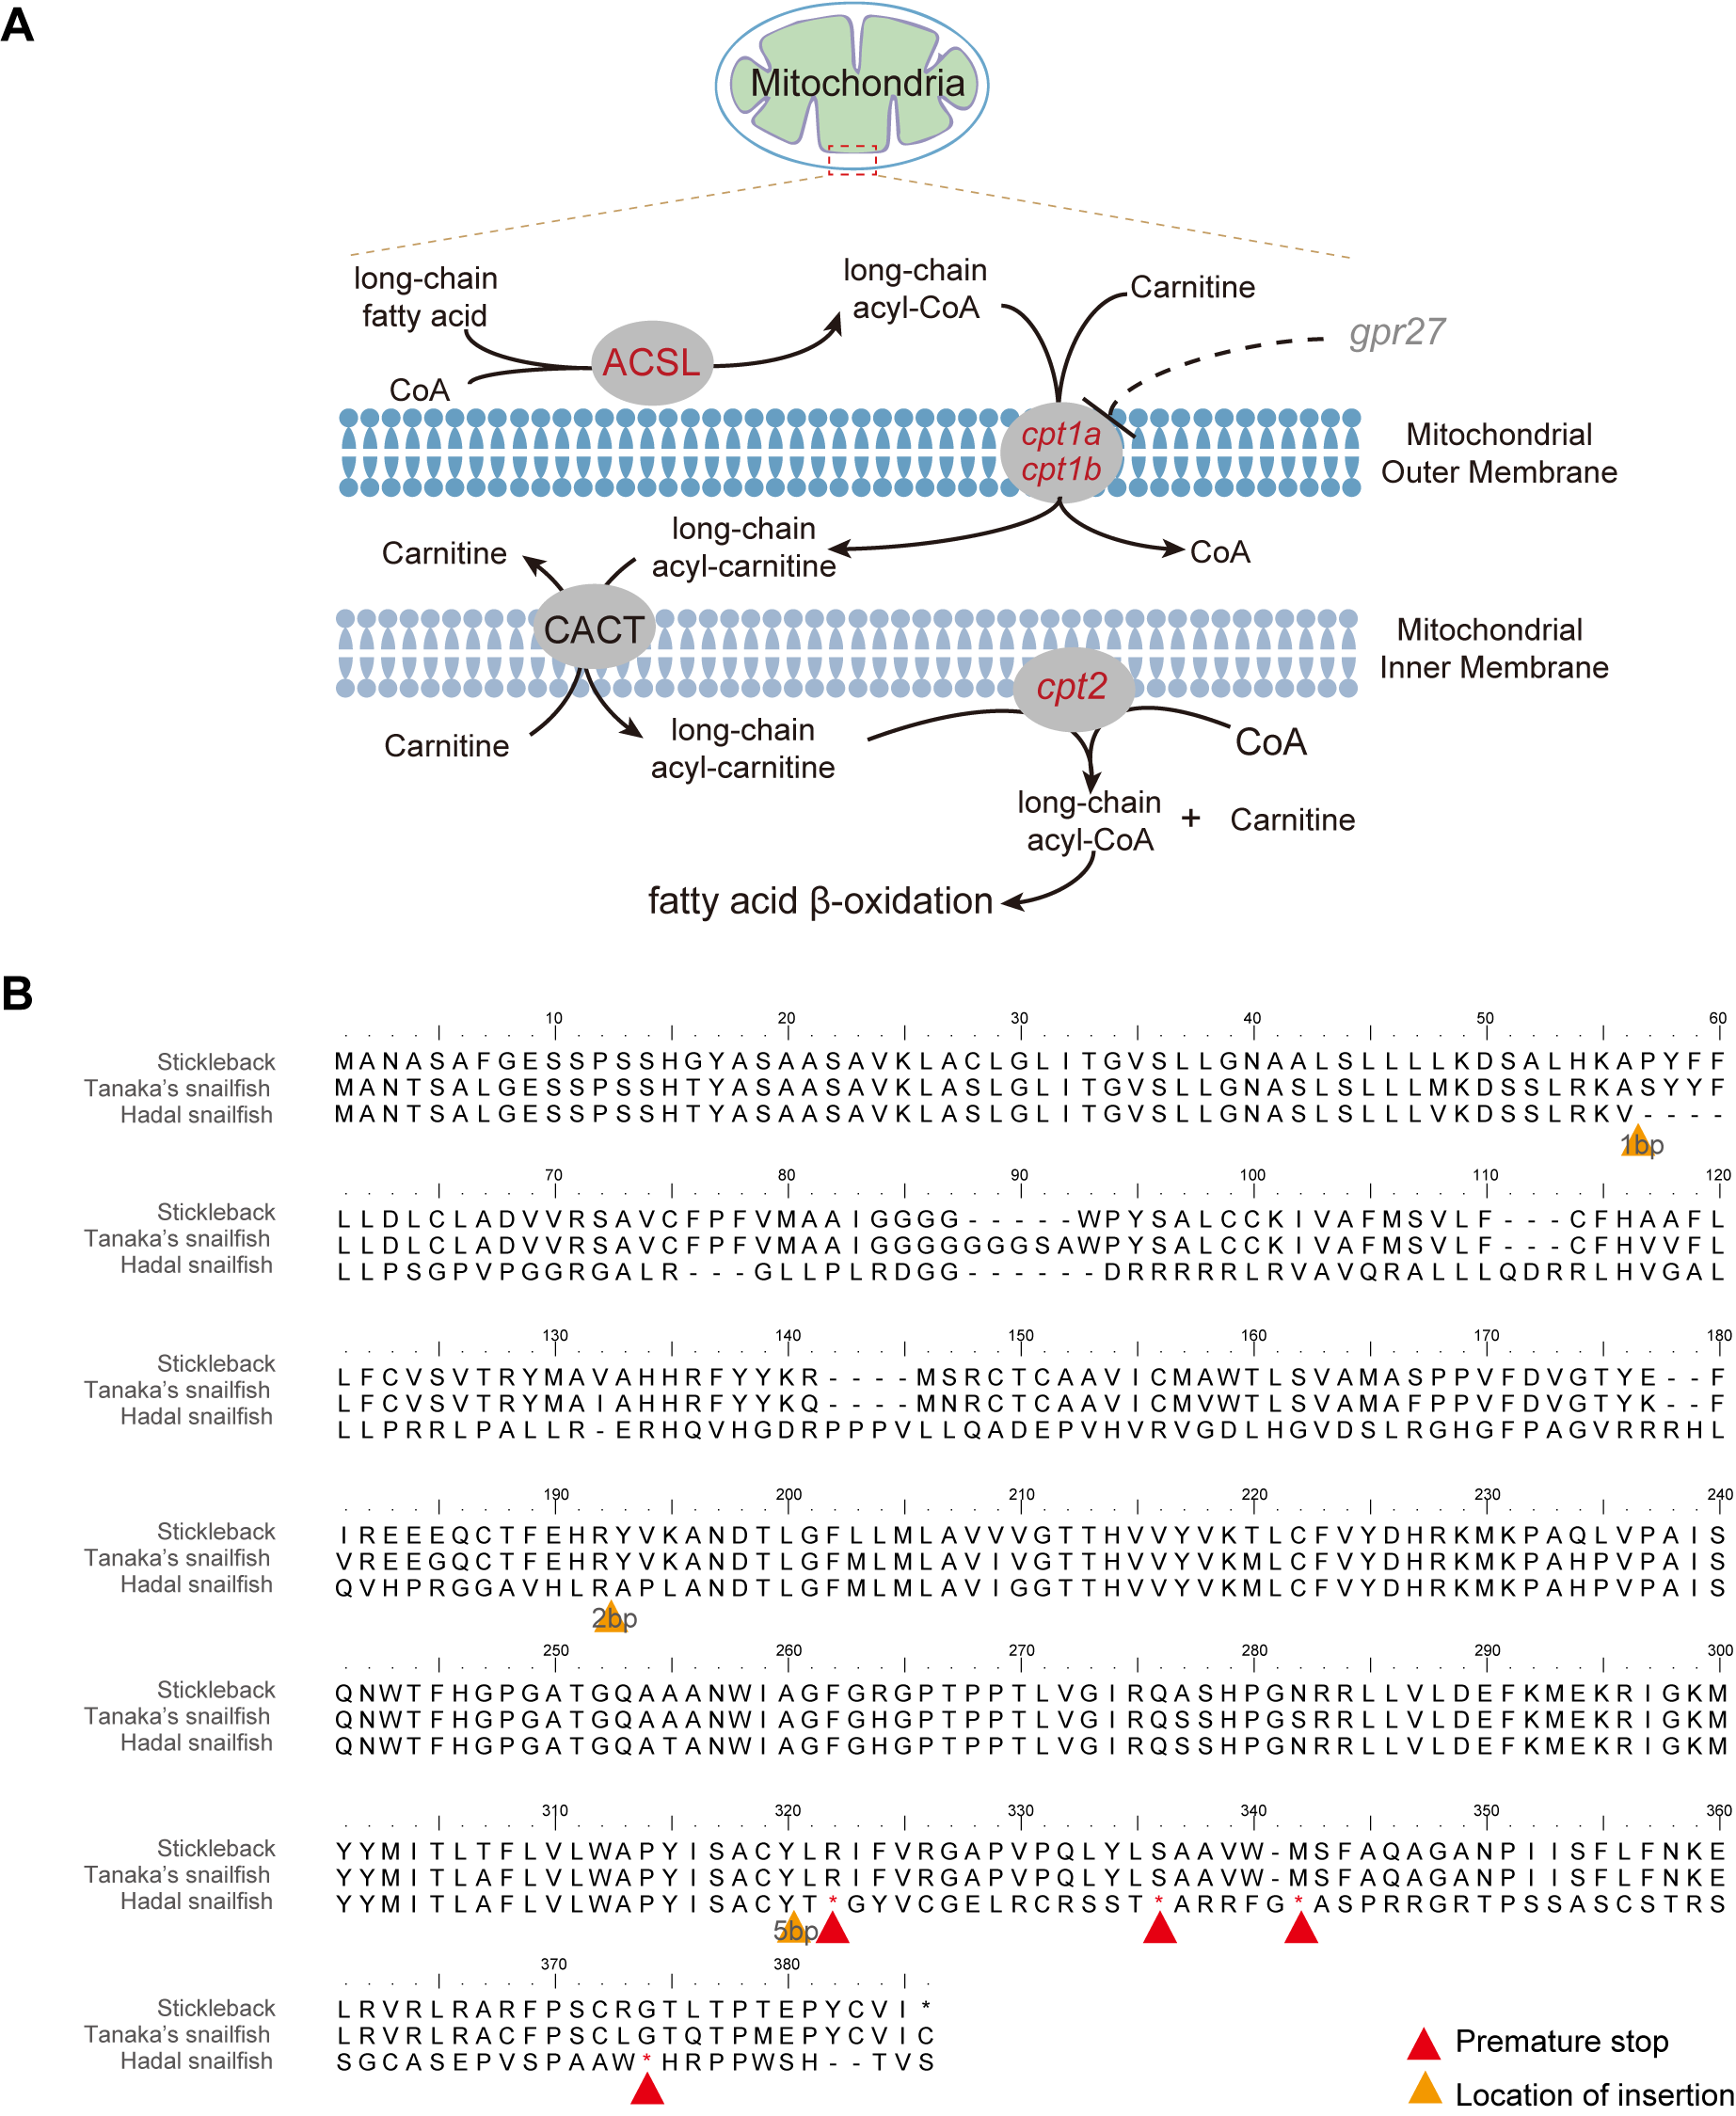
**

### Supplementary Fig. 15. Pseudogenization of *gpr27* in hadal snailfish. (A) Multiple genes associated with fatty acid entry into mitochondria were upregulated in hadal snailfish compared to Tanaka's snailfish (red). (B) The insertion changed the protein’s sequence, causing its premature termination. The numbers above the alignment represent sequence positions including gaps.

**
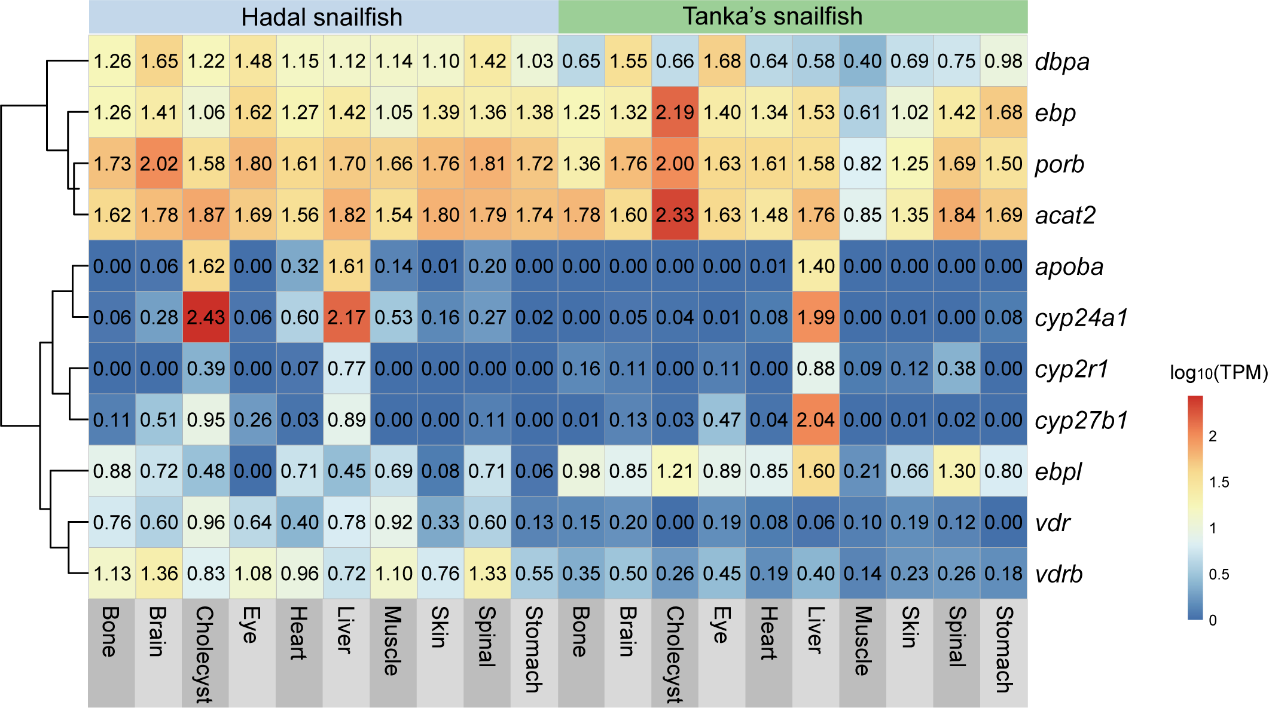
**

### Supplementary Fig. 16. Expression of the vitamin D related genes in various tissues of hadal snailfish and Tanaka's snailfish.

**
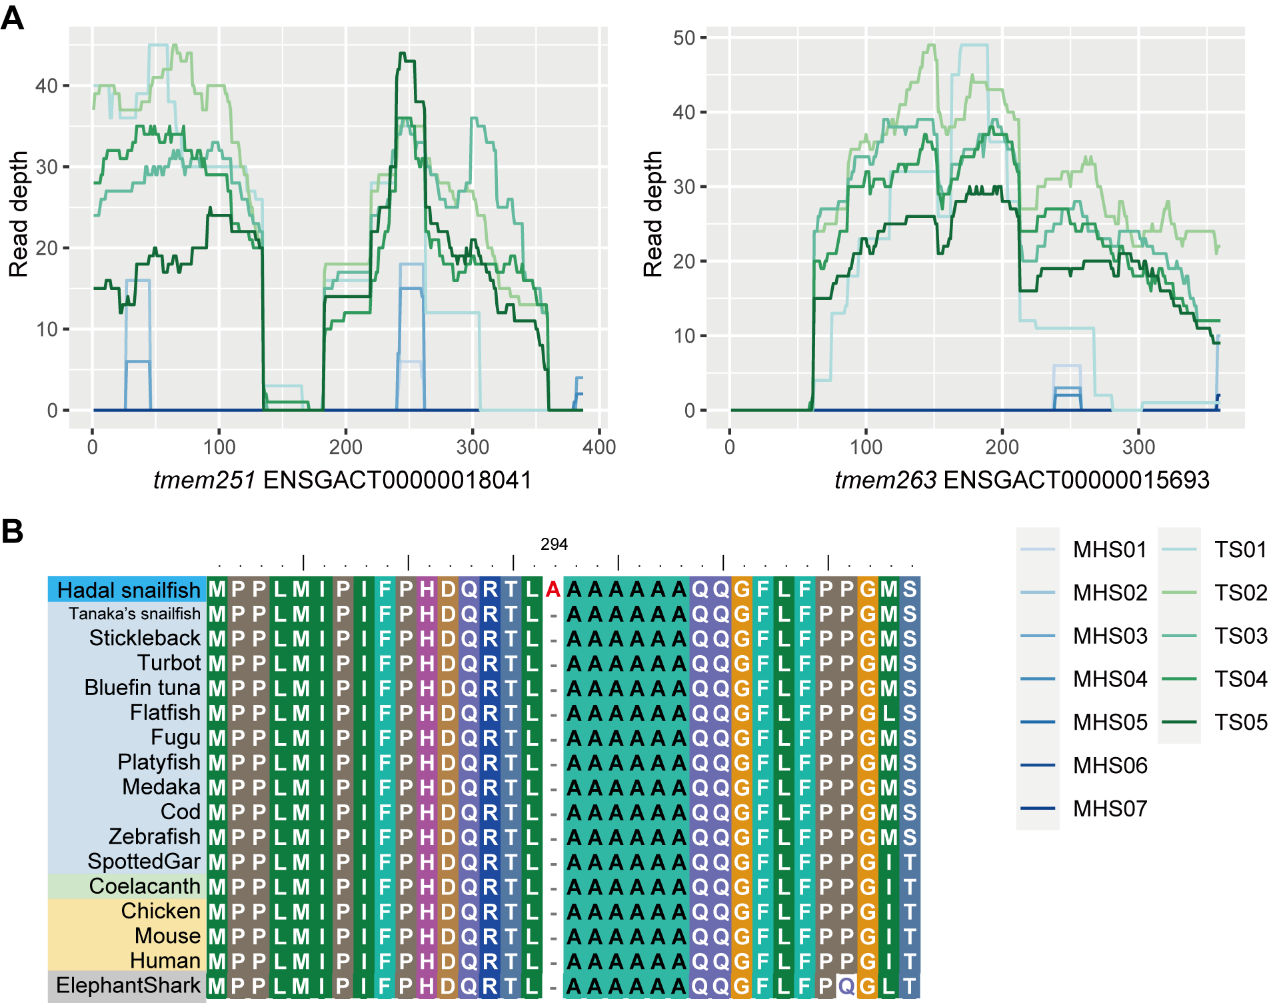
**

### Supplementary Fig. 17. Loss of skeletal formation-related genes and site-specific mutations in hadal snailfish. (A) Short reads from 7 hadal snailfish individuals (MHS01-MHS07) and 5 Tanaka's snailfish individuals (TS01-TS05) were mapped with stickleback's genome sequence, in which *tmem251* and *tmem263* genes were lost in hadal snailfish. (B) Site-specific amino acid site alterations of *sox6*. Amino acids unique to hadal snailfish are highlighted in red; positions within each sequence are given above.

**
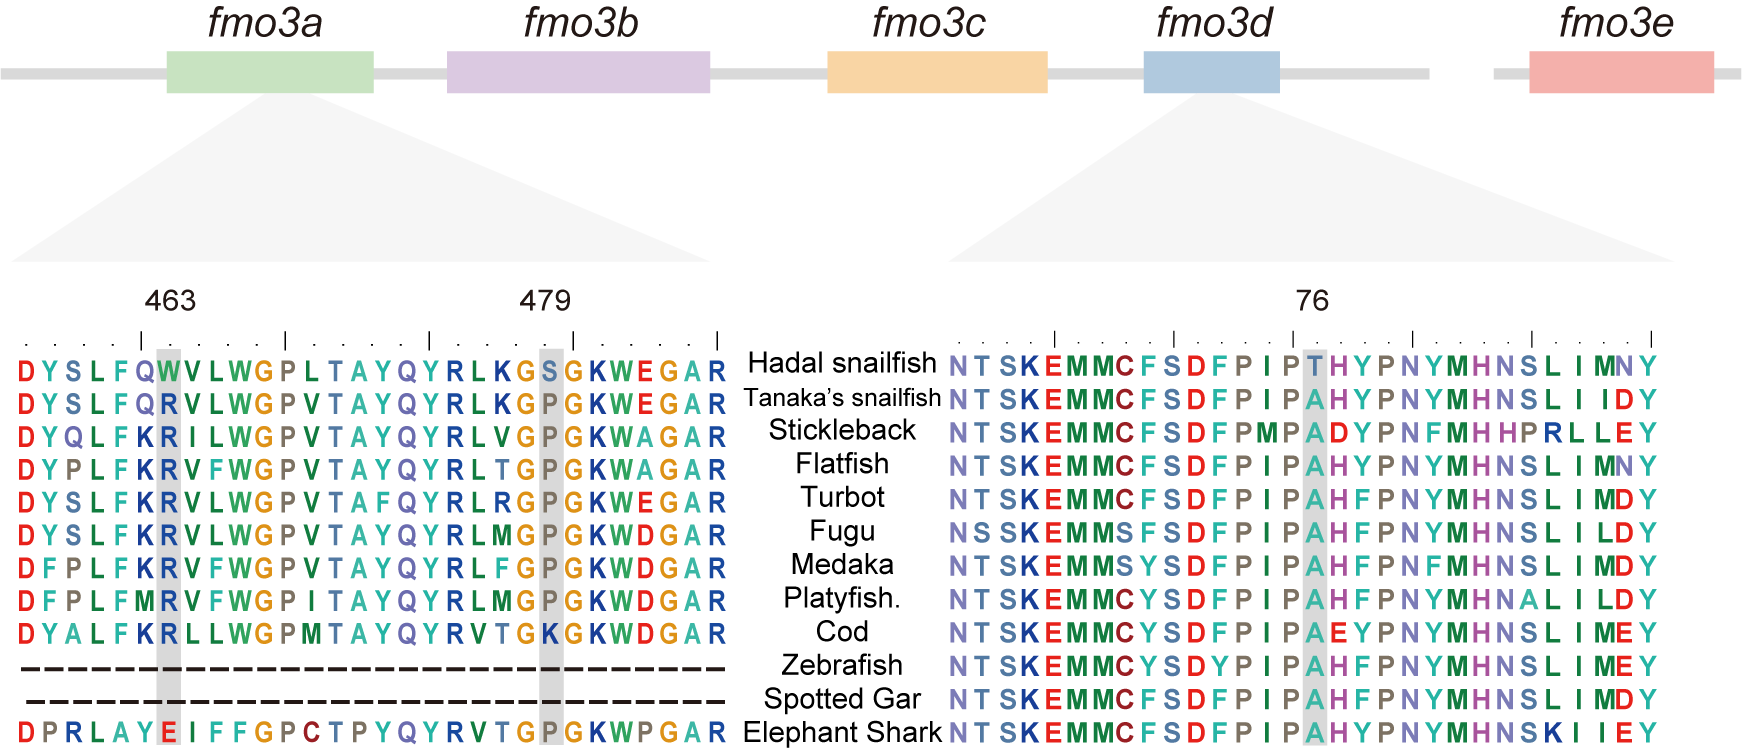
**

### Supplementary Fig. 18. Specific amino acid sites in the fmo3 protein sequence in hadal snailfish. Partial alignment of the fmo3a and fmo3d amino acid sequences from various representative teleosts, spotted gar and elephant shark. Amino acids unique to hadal snailfish are highlighted in grey; positions within each sequence are given above.

###
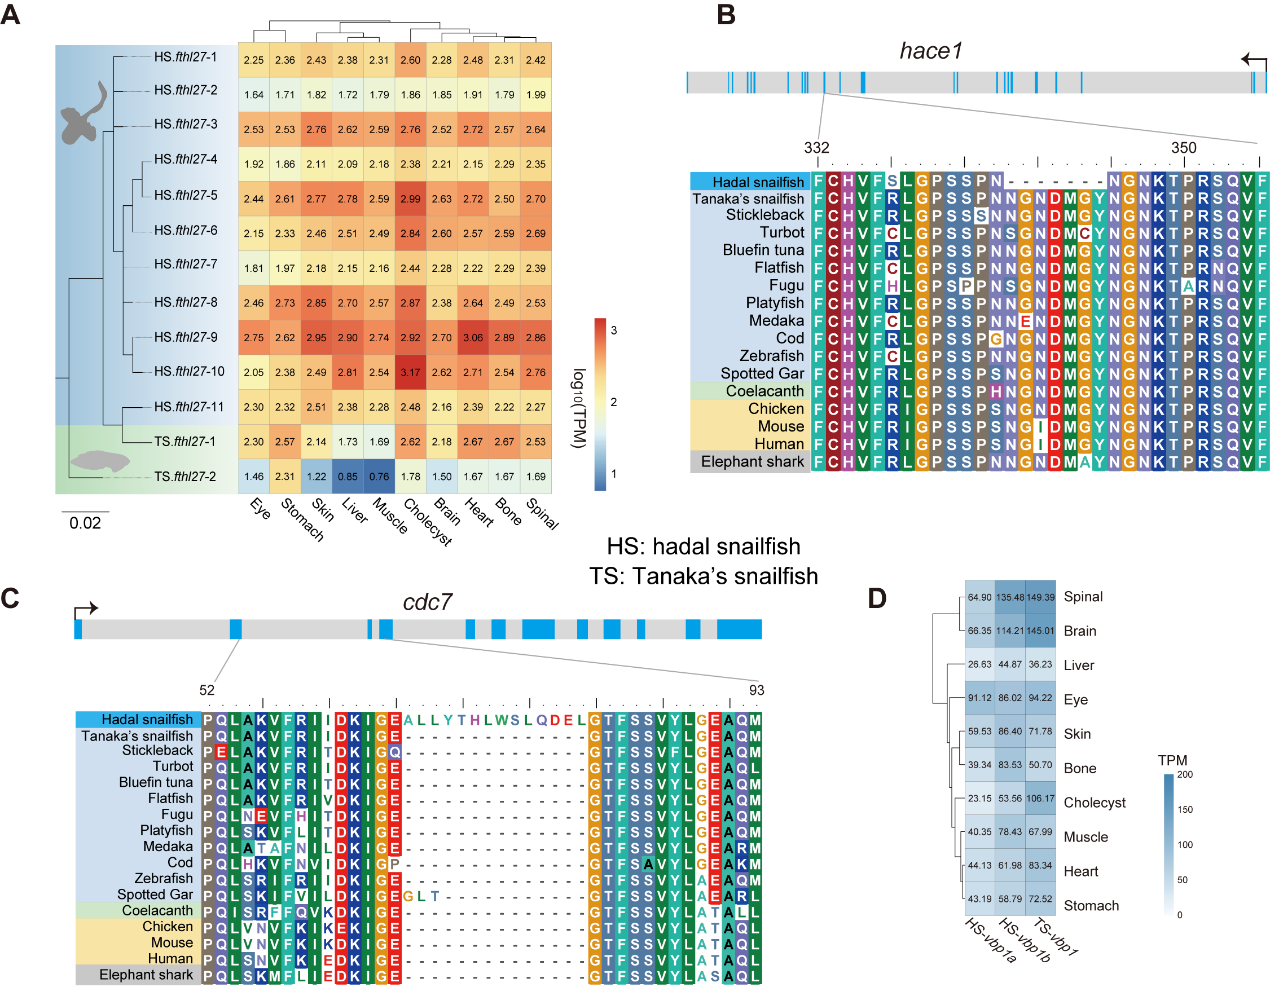
Supplementary Fig. 19. Specific genetic changes in hadal snailfish. (A) Increased gene copy number of *fthl27* and its expression in various tissue*s*. (B) Sequence alignment revealed that the amino acid sequence of *hace1*was specifically altered in hadal snailfish. (C) Specific mutations in the *cdc7* gene. (D) Expression of the *vbp1* gene in various tissues of hadal snailfish and Tanaka's snailfish.

## Supplementary Tables

### Supplementary Table 1. Details of samples used in this study.

| Species | ID in main text | name | Sources | Location (Depth) | Sampling date | Lander | Sex | Usage |
| --- | --- | --- | --- | --- | --- | --- | --- | --- |
| Hadal snailfish | MHS01 | *Pseudoliparis swirei* | PRJNA472845 | Mariana trench | —— | | | |
| MHS02 |
| MHS03 |
| MHS04 | this work | 142°26′E, 11°07′N (7254m) | Dec 14th, 2019 | Tianya | unknown | Genome sequencing, RNA-Seq |
| MHS05 | Whole Genome Resequencing, RNA-Seq |
| MHS06 |
| MHS07 |
| YHS01 | Yap hadal snailfish | SRR8510169~ SRR8510172 | Yap Trench | —— | | | |
| KHS01 | *Notoliparis kermadecensis* | KY659195.1 | Kermadec Trench | —— | | | |
| KHS02 | KY659197.1 |
| KHS03 | KY659198.1 |
| Tanaka's snailfish | TS01 | *Liparis tanakae* |  | —— | —— | | | |
| TS02 | this work | 123°37.298'E, 36°22.064'N (about 60m) | Dec 3th, 2018 | —— | unknown | Genome sequencing |
| TS03 | Whole Genome Resequencing, RNA-Seq |
| TS04 |
| TS05 |

### Supplementary Table 2. Sequencing reads of hadal snailfish.

| **Species** | **Sequencing technology** | **Sample** | **ID of library** | **Number of reads** | **Number of sequenced bases** | **Mean length of reads** |
| --- | --- | --- | --- | --- | --- | --- |
| **Hadal snailfish** | **Nanopore** | MHS04 | 1-E9-H9 | 898,765 | 23,358,551,553 | 25,990 |
| 2-E7-H7 | 851,220 | 24,489,049,393 | 28,769 |
| **Hi-C** | MHS04 | CL100089582_L01 | 1,232,922,648 | 123,292,264,800 | 100 |
| **BGI** | MHS04 | ANIcrcRAAAA-525 | 104,495,604 | 10,449,560,400 | 100 |
| ANIcrcRAAAA-526 | 96,679,592 | 9,667,959,200 | 100 |
| ANIcrcRAAAA-527 | 108,361,184 | 10,836,118,400 | 100 |
| ANIcrcRAAAA-528 | 78,114,798 | 7,811,479,800 | 100 |
| ANIcrcRAAAA-529 | 128,287,360 | 12,828,736,000 | 100 |
| ANIcrcRAAAA-530 | 112,533,976 | 11,253,397,600 | 100 |
| ANIcrcRAAAA-531 | 119,688,402 | 11,968,840,200 | 100 |
| ANIcrcRAAAA-532 | 120,058,720 | 12,005,872,000 | 100 |
| MHS05 | FIStkwRAAAA-513 | 59,854,372 | 5,985,437,200 | 100 |
| FIStkwRAAAA-514 | 38,293,100 | 3,829,310,000 | 100 |
| FIStkwRAAAA-515 | 45,536,016 | 4,553,601,600 | 100 |
| FIStkwRAAAA-516 | 59,909,422 | 5,990,942,200 | 100 |
| MHS06 | FIStkwRAAAB-529 | 57,997,078 | 5,799,707,800 | 100 |
| FIStkwRAAAB-530 | 33,763,998 | 3,376,399,800 | 100 |
| FIStkwRAAAB-531 | 55,446,658 | 5,544,665,800 | 100 |
| FIStkwRAAAB-532 | 60,286,004 | 6,028,600,400 | 100 |
| MHS07 | FIStkwRAAAC-544 | 62,328,744 | 6,232,874,400 | 100 |
| FIStkwRAAAC-545 | 40,695,892 | 4,069,589,200 | 100 |
| FIStkwRAAAC-546 | 60,126,202 | 6,012,620,200 | 100 |
| FIStkwRAAAC-547 | 43,180,218 | 4,318,021,800 | 100 |

### Supplementary Table 3. Sequencing reads of Tanaka’s snailfish.

| **Species** | **Sequencing technology** | **Sample** | **ID of library** | **Number of reads** | **Number of sequenced bases** | **Mean length of reads** |
| --- | --- | --- | --- | --- | --- | --- |
| **Tanaka's snailfish** | **Nanopore** | TS2 | NPL1013-P1 | 1,659,010 | 39,023,659,346 | 23,522 |
| **Hi-C** | TS02 | G05 | 663,068,716 | 99,460,307,400 | 150 |
| **BGI** | TS02 | jirou_C | 342,123,824 | 51,318,573,600 | 150 |
| TS03 | L1_FISvdyRAAAH-525 | 28,362,384 | 4,254,357,600 | 150 |
| L1_FISvdyRAAAH-532 | 33,617,380 | 5,042,607,000 | 150 |
| L2_FISvdyRAAAH-525 | 28,375,328 | 4,256,299,200 | 150 |
| L2_FISvdyRAAAH-532 | 33,597,258 | 5,039,588,700 | 150 |
| TS04 | L3_FISvdyRAAAI-502 | 31,964,998 | 4,794,749,700 | 150 |
| L3_FISvdyRAAAI-508 | 33,161,096 | 4,974,164,400 | 150 |
| L4_FISvdyRAAAI-502 | 30,606,316 | 4,590,947,400 | 150 |
| L4_FISvdyRAAAI-508 | 32,079,400 | 4,811,910,000 | 150 |
| TS05 | L1_FISvdyRAAAJ-509 | 29,898,940 | 4,484,841,000 | 150 |
| L1_FISvdyRAAAJ-510 | 28,662,948 | 4,299,442,200 | 150 |
| L2_FISvdyRAAAJ-509 | 29,999,222 | 4,499,883,300 | 150 |
| L2_FISvdyRAAAJ-510 | 28,830,044 | 4,324,506,600 | 150 |

### Supplementary Table 4. Genome assembly statistics for hadal snailfish and Tanaka's snailfish.

|  | **Hadal snailfish** | | | | **Tanaka's snailfish** | | | |
| --- | --- | --- | --- | --- | --- | --- | --- | --- |
|  | **Contig Size (bp)** | **Number** | **Scaffold Size (bp)** | **Number** | **Contig Size (bp)** | **Number** | **Scaffold Size (bp)** | **Number** |
|  |
| N90 | 391,659 | 216 | 22,226,877 | 21 | 488,038 | 225 | 15,372,104 | 22 |  |
| N80 | 1,199,949 | 127 | 23,411,436 | 19 | 961,961 | 145 | 19,898,281 | 19 |  |
| N70 | 2,172,367 | 87 | 24,184,323 | 16 | 1,568,523 | 102 | 20,999,279 | 16 |  |
| N60 | 2,767,116 | 62 | 24,710,793 | 14 | 2,292,284 | 73 | 22,413,529 | 14 |  |
| N50 | 4,219,354 | 44 | 25,738,204 | 11 | 3,015,465 | 51 | 23,043,945 | 11 |  |
| Longest (bp) | 17,068,874 | | 35,158,290 | | 14,501,553 | | 29,428,813 | |  |
| Total Number | 1,173 | | 199 | | 1,666 | | 926 | |  |
| Total Size (bp) | 625,564,155 | | 626,439,101 | | 554,057,755 | | 554,262,586 | |  |

### Supplementary Table 5. Results of BUSCO evaluations of hadal snailfish and Tanaka's snailfish.

| Types of BUSCOs | Hadal snailfish | | Tanaka's snailfish | |
| --- | --- | --- | --- | --- |
| number | percentage | number | percentage |
| Complete BUSCOs | 3,496 | 96.0% | 3,531 | 97.0% |
| Complete and single-copy BUSCOs | 3,458 | 95.0% | 3,497 | 96.1% |
| Complete and duplicated BUSCOs | 38 | 1.0% | 34 | 0.9% |
| Fragmented BUSCOs | 22 | 0.6% | 22 | 0.6% |
| Missing BUSCOs | 122 | 3.4% | 87 | 2.4% |
| Total number | 3,640 | | | |

### Supplementary Table 6. The genome information of the species used in this work

| **Species** | **Genome assembly version** | **Scaffolds number** | **Total length (bp)** | **N50 of scaffolds (bp)** |
| --- | --- | --- | --- | --- |
| Hadal snailfish | this work | 199 | 626,439,101 | 25,738,204 |
| Tanaka's snailfish | this work | 926 | 554,262,514 | 23,043,945 |
| Stickleback | Ensembl (BROADS1) | 1,844 | 461,533,448 | 18,115,788 |
| Pacific bluefin tuna | GCA_021601225.1 | 16,801 | 740,348,846 | 136,950 |
| Medaka | Ensembl (GRCz11.98) | 24 | 677,633,405 | 28,873,095 |
| Platy fish | Ensembl (X maculatus-5.0) | 20,632 | 729,664,433 | 1,303,070 |
| Atlantic cod | Ensembl (gadMor1) | 398,859 | 832,114,588 | 136,353 |
| Flatfish | GCF_001970005.1 | 9,525 | 643,911,827 | 10,546,925 |
| Zebrafish | Ensembl (GRCz11) | 993 | 1,373,471,384 | 54,304,671 |
| Turbot | Ensembl (ASM318616v1) | 22 | 524,979,463 | 24,811,384 |
| Fugu | Ensembl (FUGU5) | 6,835 | 391,484,725 | 11,516,971 |
| Spotted gar | Ensembl (LepOcu1) | 1926 | 945878036 | 50348508 |
| Coelacanth | Ensembl (LatCha1) | 22,819 | 2,860,591,921 | 924,513 |
| Chicken | Ensembl (Gallus gallus-5.0) | 23,475 | 1,230,258,557 | 82,310,166 |
| Mouse | Ensembl (GRCm38) | 66 | 2,730,871,774 | 130,694,993 |
| Human | Ensembl (GRCh38) | 194 | 3,099,750,718 | 145,138,636 |
| Brownbanded bamboo shark | GCA_003427335.1 | 1,145,194 | 3,851,610,035 | 69,975,007 |
| Elephant shark | Ensembl (Callorhinchus milii-6.1.3) | 21,204 | 974,498,586 | 4,521,921 |

### Supplementary Table 7. Data on annotated genes from the hadal snailfish, Tanaka's snailfish and other species used in this study.

|  | **Total number** | **Average gene length (bp)** | **Average CDS length (bp)** | **Average exon number** | **Average exon length (bp)** | **Average intron length (bp)** |
| --- | --- | --- | --- | --- | --- | --- |
| Hadal snailfish | 22,470 | 22,366.98 | 1,627.98 | 9.37 | 173.75 | 2,477.90 |
| Tanaka's snailfish | 21,370 | 21,539.68 | 1,673.33 | 9.81 | 170.53 | 2,254.29 |
| Stickleback | 20,774 | 8,454.64 | 1,549.09 | 10.40 | 148.90 | 734.36 |
| Turbot | 20,996 | 12,589.35 | 1,711.53 | 10.13 | 168.91 | 1,191.09 |
| Flatfish | 22,225 | 12,373.67 | 1,665.28 | 9.84 | 169.24 | 1,211.36 |
| Fugu | 22,225 | 12,373.67 | 1,665.28 | 9.84 | 169.24 | 1,211.36 |
| Medaka | 22,119 | 14,872.46 | 1,640.04 | 9.29 | 176.49 | 1,595.74 |
| Cod | 20,095 | 15,245.26 | 1,459.03 | 12.72 | 114.67 | 1,175.90 |
| Zebrafish | 24,269 | 25,974.38 | 1,628.44 | 9.43 | 172.73 | 2,888.83 |

### Supplementary Table 8. Summary of repetitive sequences in hadal snailfish and Tanaka's snailfish.

|  |  | **Repbase Tes** | | **TE proteins** | | **De novo** | | **Combined Tes** | |
| --- | --- | --- | --- | --- | --- | --- | --- | --- | --- |
| **Species** | **Type** | **Length (bp)** | **Percent in genome** | **Length (bp)** | **Percent in genome** | **Length (bp)** | **Percent in genome** | **Length (bp)** | **Percent in genome** |
| **Hadal snailfish** | DNA | 49,969,082 | 8.00% | 522,621 | 0.08% | 70,989,907 | 11.37% | 86,032,513 | 13.76% |
| LINE | 25,127,686 | 4.02% | 33,173,787 | 5.31% | 48,699,962 | 7.80% | 52,315,769 | 8.37% |
| SINE | 925,347 | 0.15% | 0 | 0.00% | 2,897,295 | 0.46% | 3,197,636 | 0.51% |
| LTR | 11,641,868 | 1.86% | 10,534,119 | 1.69% | 13,422,771 | 2.15% | 20,613,824 | 3.30% |
| Other | 12,205,833 | 1.95% | 0 | 0.00% | 34,341,239 | 5.50% | 117,703,622 | 18.82% |
| Unknown | 260,761 | 0.04% | 0 | 0.00% | 34,939,592 | 5.59% | 33,903,882 | 5.42% |
| Total | 100,130,577 | 16.03% | 44,230,527 | 7.08% | 205,290,766 | 32.87% | 245,481,550 | 39.25% |
| **Tanaka's snailfish** | DNA | 61,762,107 | 11.14% | 153,360 | 0.03% | 43,627,754 | 7.87% | 71,225,926 | 12.85% |
| LINE | 11,062,444 | 2.00% | 11,118,474 | 2.01% | 23,017,919 | 4.15% | 27,900,710 | 5.03% |
| SINE | 559,686 | 0.10% | 0 | 0.00% | 2,726,622 | 0.49% | 3,147,544 | 0.57% |
| LTR | 9,020,250 | 1.63% | 3,518,637 | 0.63% | 4,519,388 | 0.82% | 12,541,024 | 2.26% |
| Other | 13,599,599 | 2.45% | 0 | 0.00% | 50,024,511 | 9.03% | 127,716,575 | 23.04% |
| Unknown | 85,598 | 0.02% | 0 | 0.00% | 29,219,311 | 5.27% | 28,202,254 | 5.09% |
| Total | 96,089,684 | 17.34% | 14,790,471 | 2.67% | 153,135,505 | 27.63% | 185,707,210 | 33.51% |

### Supplementary Table 9. The unitary pseudogenes identified in hadal snailfish.

| **ENSEMBLE transcript ID of stickleback** | **ENSEMBLE Gene ID of stickleback** | **gene name** |
| --- | --- | --- |
| ENSGACT00000000480 | ENSGACG00000000375 | NA |
| ENSGACT00000000788 | ENSGACG00000000611 | *gpr19* |
| ENSGACT00000001752 | ENSGACG00000001346 | *rdh20* |
| ENSGACT00000006183 | ENSGACG00000004668 | NA |
| ENSGACT00000007461 | ENSGACG00000005627 | NA |
| ENSGACT00000008086 | ENSGACG00000006099 | NA |
| ENSGACT00000009252 | ENSGACG00000006968 | *si:dkey-178k16.1* |
| ENSGACT00000009487 | ENSGACG00000007152 | *bglap* |
| ENSGACT00000011918 | ENSGACG00000008967 | *dnah5l* |
| ENSGACT00000014005 | ENSGACG00000010575 | *gpr65* |
| ENSGACT00000015577 | ENSGACG00000011757 | NA |
| ENSGACT00000015663 | ENSGACG00000011823 | *gpr27* |
| ENSGACT00000017747 | ENSGACG00000013397 | *plppr3b* |
| ENSGACT00000018536 | ENSGACG00000014008 | NA |
| ENSGACT00000020957 | ENSGACG00000015845 | *PRTG* |
| ENSGACT00000021892 | ENSGACG00000016544 | *neil3* |
| ENSGACT00000024186 | ENSGACG00000018259 | *ccng2* |
| ENSGACT00000025661 | ENSGACG00000019379 | NA |
| ENSGACT00000026992 | ENSGACG00000020382 | *rrm1* |

### Supplementary Table 10. List of genes with more copies in hadal snailfish compared to Tanaka’s snailfish.

| **Gene name** | **Gene number** | |
| --- | --- | --- |
| hadal snailfish | Tanaka's snailfish |
| *acaa1* | 5 | 1 |
| *asic1a* | 3 | 2 |
| *asrgl1* | 2 | 1 |
| *cldnj* | 3 | 1 |
| *cu638714.1* | 14 | 2 |
| *ENSGACT00000016830* | 4 | 1 |
| *erg28* | 2 | 1 |
| *fthl27* | 11 | 2 |
| *igf1* | 6 | 1 |
| *klhl10a* | 15 | 3 |
| *mxa* | 4 | 2 |
| *pebp1* | 2 | 1 |
| *ptgs1* | 5 | 2 |
| *si:ch211-193k19.2* | 23 | 2 |
| *si:ch211-57b15.2* | 21 | 7 |
| *si:ch211-57f7.7* | 7 | 2 |
| *stat1a* | 2 | 1 |
| *vbp1* | 2 | 1 |
| *zp3b* | 12 | 8 |
| *zp3f.1* | 11 | 7 |
| *zp3f.2* | 2 | 1 |

### Supplementary Table 11. The genes with site-specific amino acid mutations (with a length ≥ 3 amino acids) in hadal snailfish.

| Gene name | Type | AA sites |
| --- | --- | --- |
| *tmc1* | loss | 12 |
| *atxn2* | loss | 8 |
| *hace1* | loss | 7 |
| *bnip1a* | loss | 6 |
| *mtmr3* | loss | 6 |
| *mitfb* | loss | 5 |
| *zgc:172139* | loss | 5 |
| *pdik1l* | loss | 4 |
| *iqsec1* | loss | 4 |
| *tle1* | loss | 4 |
| *pou6f2* | loss | 4 |
| *nop56* | loss | 4 |
| *tnni1a* | loss | 3 |
| *ssbp2* | loss | 3 |
| *lef1* | loss | 3 |
| *mbnl2* | gain | 70 |
| *wdr37* | gain | 68 |
| *si:ch211-244b2.1* | gain | 51 |
| *phf6* | gain | 36 |
| *senp8* | gain | 35 |
| *atpsckmt* | gain | 24 |
| *grk4* | gain | 23 |
| *atad3A* | gain | 19 |
| *pbdc1* | gain | 19 |
| *si:ch73-116o1.2* | gain | 18 |
| *cdc7* | gain | 11 |
| *med24* | gain | 11 |
| *chtopa* | gain | 11 |
| *heatr5b* | gain | 9 |
| *znrd1* | gain | 8 |
| *cluha* | gain | 7 |
| *usp15* | gain | 5 |
| *tada2b* | gain | 4 |

### Supplementary Table 12. Depth of survival of some fishes of the Liparidae.

| **Banay** | **Genus** | **Espesye** | **Maximum Depth (m)** |
| --- | --- | --- | --- |
| *Liparidae* | *Careproctus* | *Careproctu colletti* | 1350 |
| *Liparidae* | *Careproctus* | *Careproctus cypselurus* | 1775 |
| *Liparidae* | *Careproctus* | *Careproctus marginatus* | 950 |
| *Liparidae* | *Careproctus* | *Careproctus roseofuscus* | 1950 |
| *Liparidae* | *Crystallias* | *Crystallias matsushimae* | 700 |
| *Liparidae* | *Liparis* | *Liparis agassizii* | 100 |
| *Liparidae* | *Liparis* | *Liparis ochotensis* | 761 |
| *Liparidae* | *Liparis* | *Liparis punctulatus* | 20 |
| *Liparidae* | *Liparis* | *Liparis tanakae* | 121 |
| *Liparidae* | *Liparis* | *Liparis tessellatus NSMT* | 346 |
| *Liparidae* | *Nectoliparis* | *Nectoliparis pelagicus* | 3383 |
| *Liparidae* | *Paraliparis* | *Paraliparis dipterus* | 250 |
| *Liparidae* | *Paraliparis* | *Paraliparis meridionalis* | 932 |
| *Liparidae* | *Rhodichthys* | *Rhodichthys regina* | 2365 |

### Supplementary Table 13. The TPM of *fmo3* gene copies in hadal snailfish and Tanaka's snailfish.

| **Species** | **Gene** | **bone** | **brain** | **cholecyst** | **eye** | **heart** | **liver** | **muscle** | **skin** | **spinal cord** | **stomach** |
| --- | --- | --- | --- | --- | --- | --- | --- | --- | --- | --- | --- |
| Hadal snailfish | *fmo3a* | 0.11 | 4.21 | 641.01 | 0.07 | 20.15 | 842.59 | 4.14 | 17.97 | 5.24 | 0.95 |
| *fmo3b* | 7.31 | 0.36 | 57.62 | 0.02 | 1.90 | 44.83 | 0.82 | 0.84 | 0.42 | 0.17 |
| *fmo3c* | 79.88 | 1.15 | 17.65 | 1.47 | 4.30 | 18.54 | 5.77 | 3.38 | 0.66 | 7.19 |
| *fmo3d* | 41.69 | 11.58 | 44.70 | 2.35 | 16.39 | 82.67 | 12.93 | 9.86 | 6.27 | 62.19 |
| *fmo3e* | 9.26 | 15.65 | 19.62 | 7.71 | 19.60 | 16.95 | 5.63 | 8.17 | 13.03 | 4.74 |
| Tanaka's snailfish | *fmo3a* | 0.20 | 0.05 | 0.58 | 0.03 | 0.41 | 899.11 | 0.05 | 0.29 | 0.23 | 0.07 |
| *fmo3b1* | 0.00 | 0.00 | 0.00 | 0.00 | 0.00 | 0.00 | 0.00 | 0.00 | 0.01 | 0.00 |
| *fmo3b2* | 0.00 | 0.06 | 0.14 | 0.00 | 0.00 | 6.62 | 0.00 | 0.04 | 0.00 | 0.00 |
| *fmo3b3* | 0.01 | 0.04 | 3.46 | 0.00 | 0.00 | 0.00 | 0.00 | 0.00 | 0.00 | 0.10 |
| *fmo3c* | 0.08 | 0.02 | 0.01 | 0.06 | 0.04 | 6.53 | 0.00 | 0.07 | 0.04 | 0.00 |
| *fmo3d* | 7.60 | 4.50 | 12.43 | 4.87 | 3.32 | 97.81 | 0.62 | 3.77 | 4.06 | 8.36 |
| *fmo3e* | 5.04 | 11.50 | 1.15 | 15.27 | 6.41 | 3.65 | 1.15 | 2.62 | 8.93 | 1.20 |

### Supplementary Table 14 These genes were significantly down-regulated in all tissues of the hadal snailfish.

| **Hadal snailfish** | **Tanaka's snailfish** | **ENSEMBLE transcript ID of zebrafish** | **Gene name** |
| --- | --- | --- | --- |
| HS08485 | Tanaka01323 | ENSDART00000006436 | *pink1* |
| HS20513 | Tanaka15846 | ENSDART00000121728 | *rpl19* |
| HS00527 | Tanaka10797 | ENSDART00000036456 | *cycsb* |
| HS09857 | Tanaka18383 | ENSDART00000168182 | *dglucy* |
| HS17147 | Tanaka02988 | ENSDART00000024615 | *rnpepl1* |
| HS04375 | Tanaka06259 | ENSDART00000063912 | *jun* |
| HS13664 | Tanaka21268 | ENSDART00000079984 | *rpl22l1* |

### Supplementary Table 15 GO enrichment was significant in all organs of hadal snailfish with highly expressed genes.

| **GO term** | **Type** | **Function** | **P-value** | **Adjusted**  **P-value** |
| --- | --- | --- | --- | --- |
| GO:0000077 | Biological Process | DNA damage checkpoint | 2.21E-04 | 1.77E-02 |
